# Supplementary material for: Electronic structure of p-type perylene monoimide-based donor–acceptor dyes on the nickel oxide (100) surface: a DFT approach
Source: Royal Society of Chemistry journal article supplement (doi:10.1039/c6cp02510b), 2016-01-01
Supplement: c6cp02510b1.pdf [file c6cp02510b1.pdf]

**Supplementary information for “ELECTRONIC STRUCTURE OF P-TYPE  
PERYLENE MONOIMIDE-BASED DONOR–ACCEPTOR DYES ON THE  
NICKEL OXIDE (100) SURFACE: A DFT APPROACH”**

**O. V. Kontkanen,<sup>ab</sup> M. Niskanen, <sup>\*ac</sup> T. I. Hukka<sup>\*a</sup> and T. T. Rantala<sup>b</sup>**

<sup>a</sup>Department of Chemistry and Bioengineering, Tampere University of Technology, P.O. Box 541, Tampere, FI-33101, FINLAND

<sup>b</sup>Department of Physics, Tampere University of Technology, P.O. Box 692, Tampere, FI-33101, FINLAND

<sup>c</sup>Department of Physics, Imperial College London, South Kensington Campus, London SW7 2AZ, U.K.

FirstName.LastName@tut.fi

## 1. SUPPLEMENTARY INFORMATIONS RELATIVE TO THE ISOLATED DYE MOLECULES

Isolated dye molecules were calculated with Gaussian09 using the B3LYP hybrid functional and the 6-31(d) basis set. We provide the optimized geometries and the minimum energies for all dye molecules in the APPENDIX 1 (Tables S2 - S9).

We also performed a scan calculation for the molecule **2** to study conformation changes due to thermal vibrations. The results presented in Fig. S1 demonstrate that the dye molecule is able to rotate  $\sim 20$  degrees, because the energy required for rotation is small. However, this does not affect the energy levels, which means that the small rotation will not have an effect on the results. The B3LYP TD-DFT results are depicted in Figures S2 - S5.

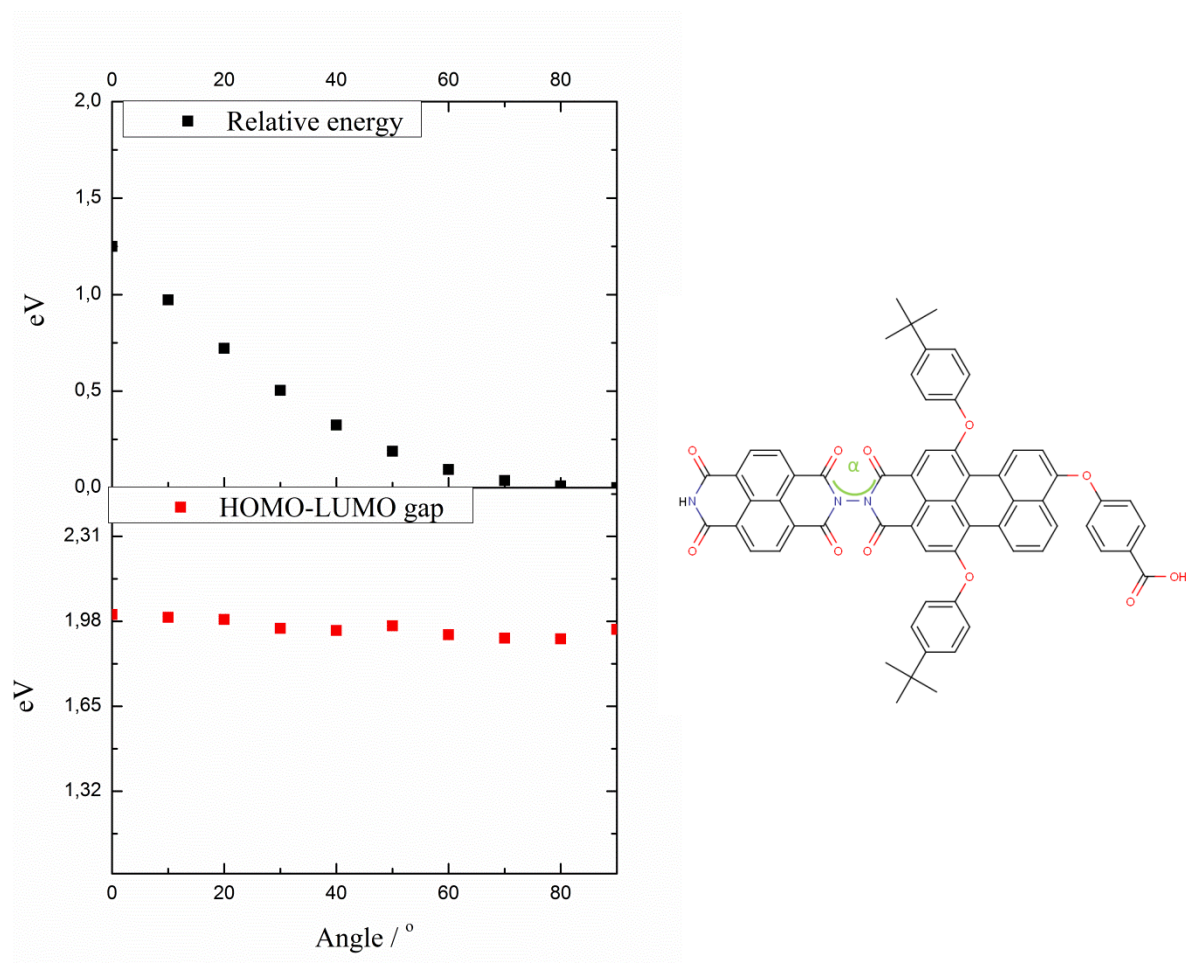

**Fig S1.** Potential energy scan of angle ( $\alpha$ ) in model **2** and its effect on the HOMO-LUMO gap.

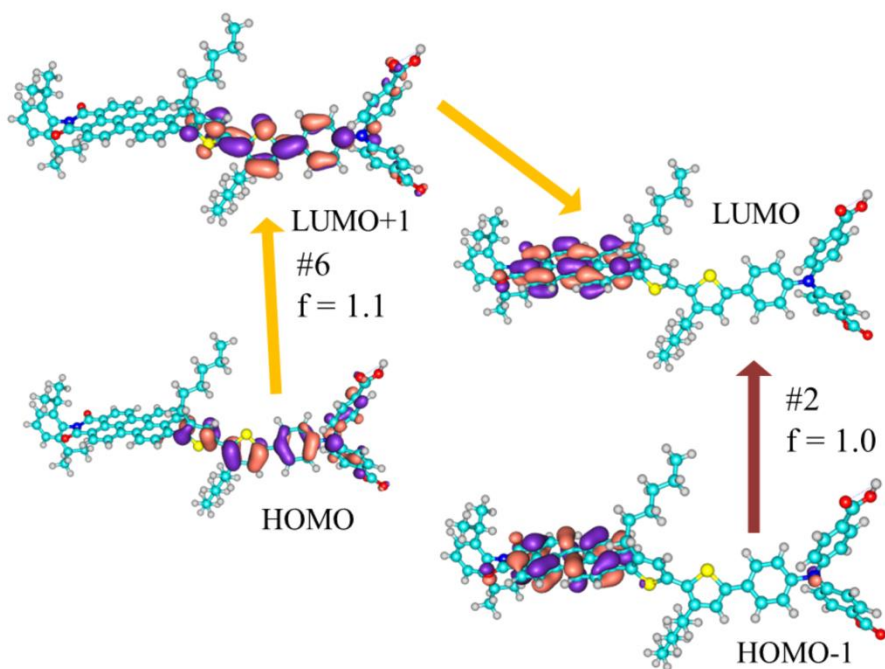

**Fig. S2.** Orbitals corresponding to the transitions presented in Table 1 for dye **1**. Yellow arrows demonstrate the desired transitions and the red arrow the possible but non-desired transition. Value  $f$  is the oscillator strength.

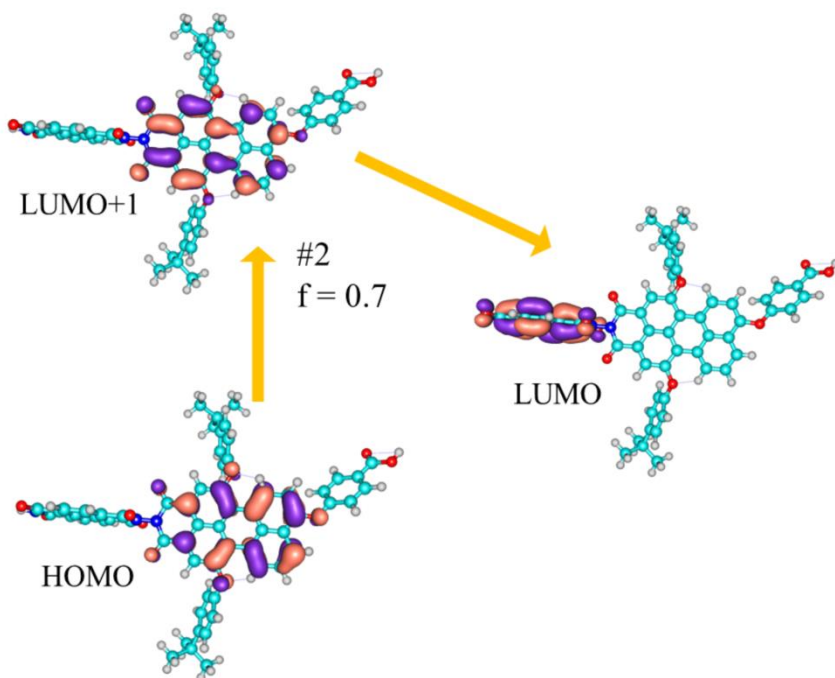

**Fig. S3.** Orbitals corresponding to the transitions presented in Table 1 for dye 2. Yellow arrows demonstrate the desired transitions. Value  $f$  is the oscillator strength.

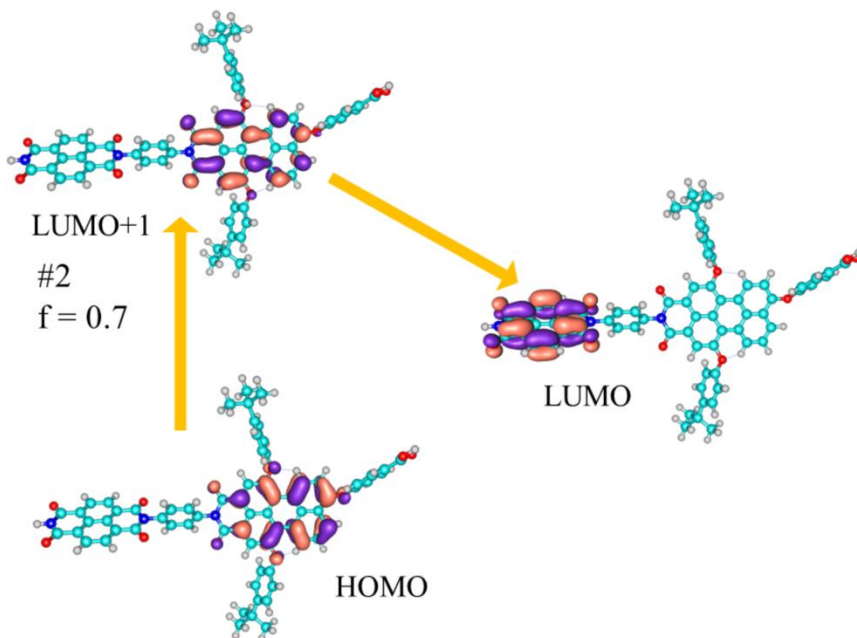

**Fig. S4.** Orbitals corresponding to the transitions presented in Table 1 for dye 3. Yellow arrows demonstrate the desired transitions. Value  $f$  is the oscillator strength.

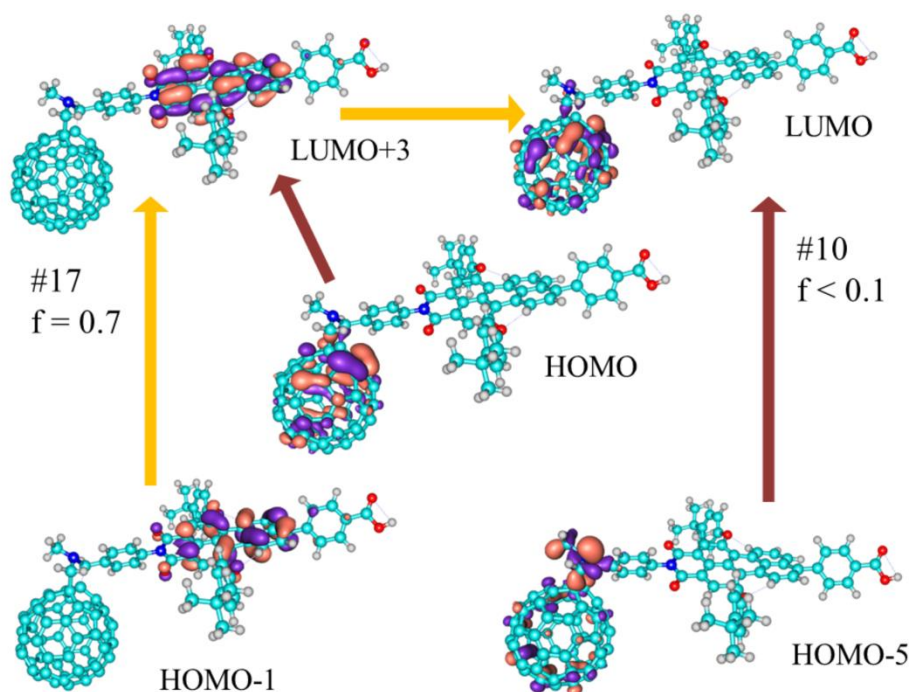

**Fig. S5.** Orbitals corresponding to the transitions presented in Table 1 for dye **4**. Yellow arrows demonstrate the desired transitions and the red arrows the possible but non-desired transitions. Value  $f$  is the oscillator strength.

We performed TDDFT calculations with CAM-B3LYP to confirm the B3LYP results. The CAM-B3LYP results are similar to the B3LYP results. The strongest excitations are from HOMO to LUMO+1 as to be expected (inside the donor). The oscillator strength ( $f$ ) is stronger and wavelength is 20 - 50 nm shorter, but it is expected/normal according to the previous similar studies [1,2].

## 2. SUPPLEMENTARY INFORMATION RELATIVE TO THE SEMICONDUCTOR: THE NiO BULK AND THE NiO(100) SURFACE

NiO crystal structure and surfaces have been studied in the past both experimentally and theoretically (see Table S1) so we compare our results to the previous data. We used CRYSTAL09 program for our calculations. The B3LYP density functional was used with 86411/6411/41 and 8411/411 basis sets for Ni and O, respectively. The NiO bulk model was optimized using 65 unique k-points and the surface model contained 34 unique k-points.

**Table S1.** Calculated and experimental band gaps of the NiO(100) surface reported in literature in comparison with our own value.

| Computation/<br>Experiment/ | Software /<br>Method                 | $E_g$ / eV | Slab<br>thickness<br>in layers | Reference   |
|-----------------------------|--------------------------------------|------------|--------------------------------|-------------|
| Computation                 | MOLCAS3/<br>CASSCF/CASPT2            | 4.04/3.88  |                                | 3           |
|                             | Own code/(SIC)-<br>LSD <sup>i</sup>  | 2.72       |                                | 4           |
|                             | CRYSTAL95/UHF                        | ~4         | 1                              | 5           |
|                             | CRYSTAL98/B3LYP                      | 3.9        |                                | 6           |
|                             | CRYSTAL09/B3LYP<br>-the present work | 4.0        | 4 (4 × 4)                      | this work   |
|                             | VASP/HSE03                           | 4.1        |                                | 7           |
|                             | VASP/PBE+U                           | 3.02       |                                | 8           |
| Experiment                  | Optical abs. threshold               | 3.8        |                                | 9           |
|                             | Inversed<br>photoemission            | 3.5<br>4.3 |                                | 10,11<br>12 |

i. SIC-LSD: self-interaction-corrected local spin density

Following tools (keywords) were used to describe the system: EIGSHIFT, LEVSHIFT, ATOMSPIN, SPINLOCK, FMIXING, BROYDEN, and SMEAR. EIGSHIFT was used to lower the preferred Ni  $\alpha$  or  $\beta$  d-orbitals to make the antiferromagnetic AF2 initial guess occupation for the first SCF cycle. LEVSHIFT increases the band gap to prevent the occupied states from mixing with the unoccupied states. Next two keywords are spin related. ATOMSPIN was used to determine the AF2 spin state. SPINLOCK was used to keep the total spin density unchanged from initial guess until 20 SCF cycles had passed. FMIXING and BROYDEN describe how much the SCF guess is allowed to change for the next cycle. The difference is that the initial FMIXING value can be changed with BROYDEN after certain amount of SCF cycles (e.g. 20–50 depending of the system) has passed. We used first higher mixing rate (90 to 80) for 20–30 cycles, after which BROYDEN changes the FMIXING value to 55. Last keyword, SMEAR, affects the occupation of the orbitals in Fermi level by adjusting the finite temperature.

The DOS and band structures of the NiO bulk and the NiO(100) surface are presented in Figures S6 - S10. Figures S6 and S7 show results for NiO bulk and Figures S8 - S10 for the NiO(100) surface. In Figure S10 the partial DOS (PDOS) of the 3d orbitals of the NiO surface demonstrates that the Ni atomic orbitals which have the  $e_g$  and  $t_{2g}$  symmetry are split so that the  $t_{2g}$  orbitals are occupied and the  $e_g$  orbitals lie on the conduction band. We do not go into deep details of the DOS and band structures of the NiO bulk and the NiO(100) surface as they and their properties have already been calculated in the previous studies (see the references in Table S1). We only note that our results are in agreement with the previously calculated and experimental results.

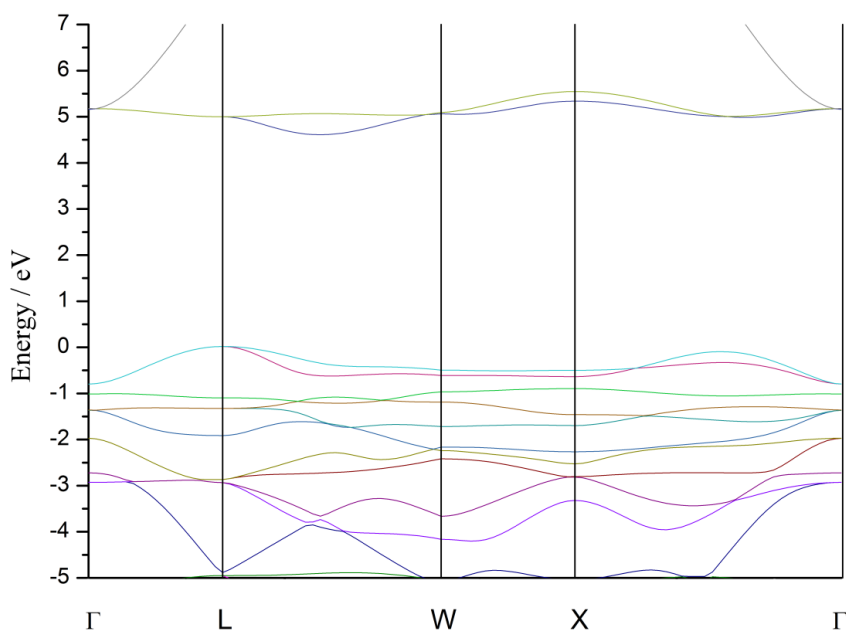

**Fig. S6.** The band structure of the NiO bulk.

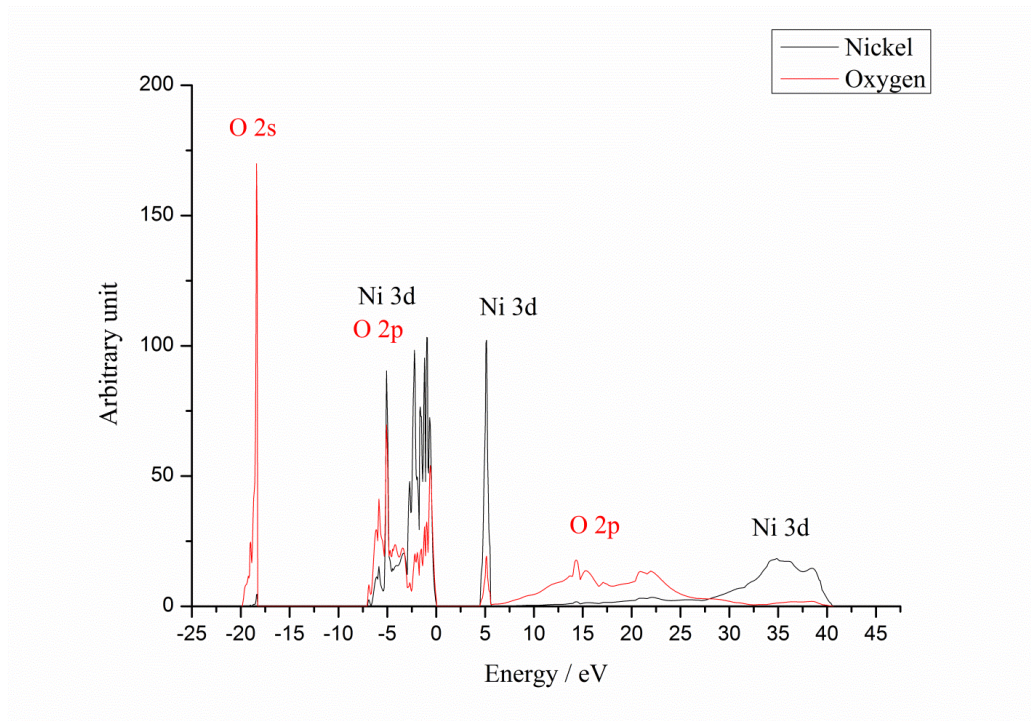

**Fig S7.** DOS of the bulk.

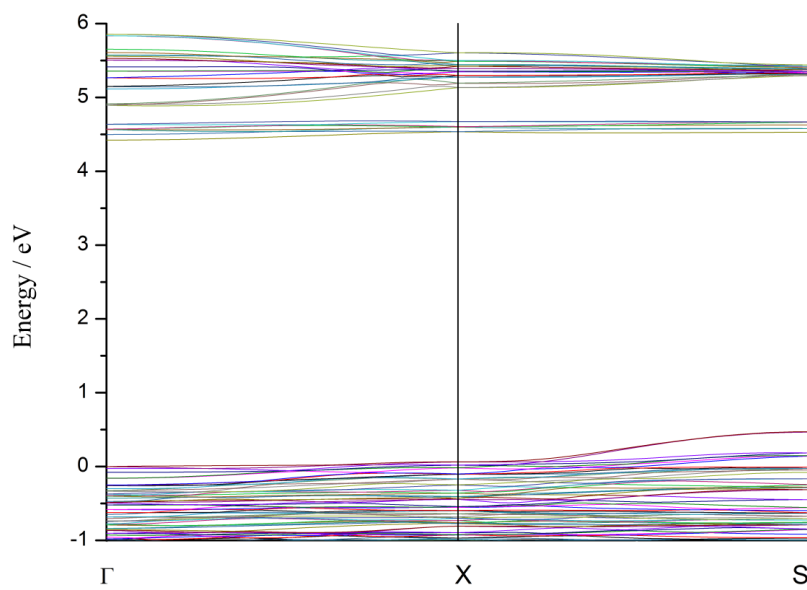

**Fig S8.** The band structure of the NiO(100) surface.



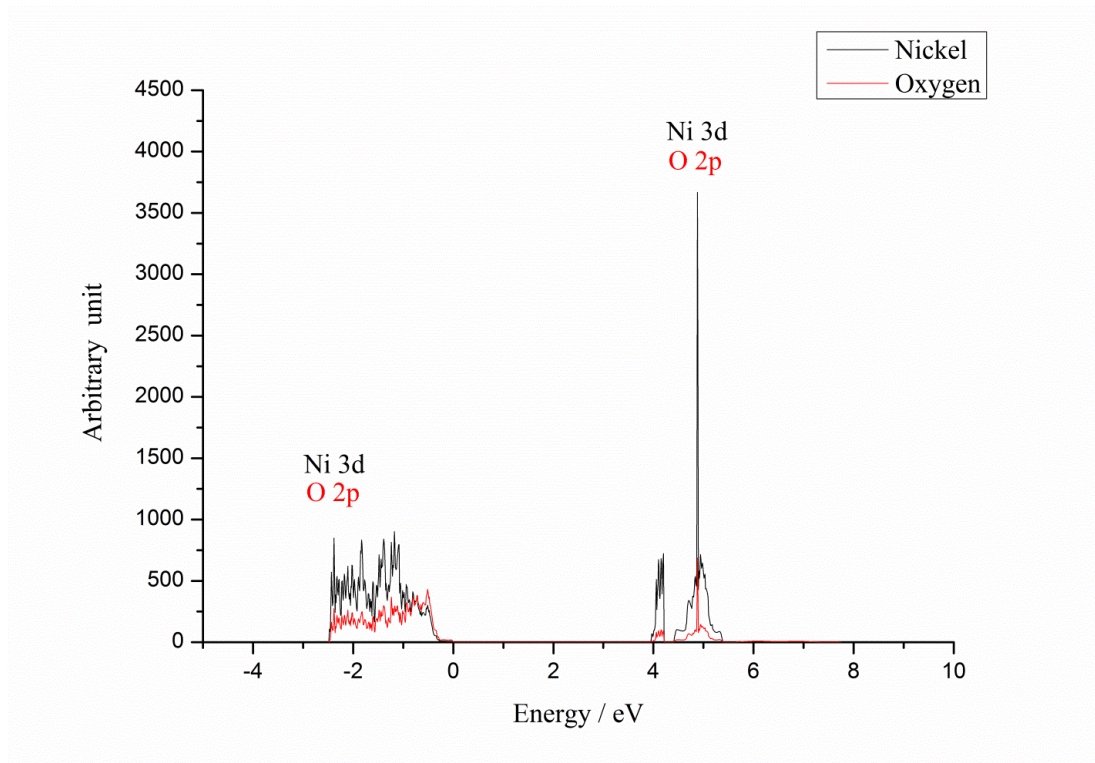

**Fig S9.** DOS of the NiO(100) surface.

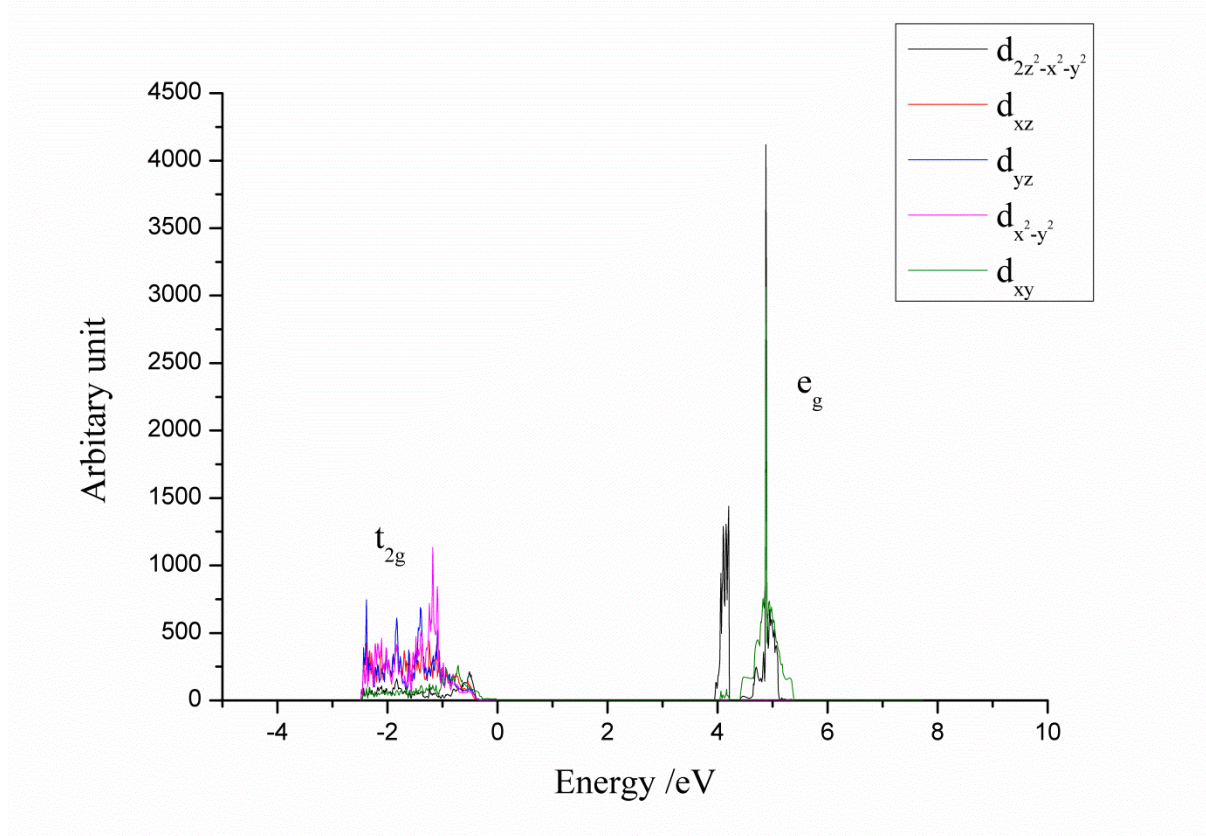

**Fig S10.** PDOS of the NiO(100) surface. The image shows only d-orbitals of the nickel. They are splitted as shown in Figure.

### Effective Hole Mass

From our calculated band energies, we can evaluate the effective masses of charge carriers with the equation 1 of the main article. To find the second derivative we first discretize the first derivatives as

$$\frac{dE}{dk} = \frac{\Delta E}{\Delta k} = \frac{E_2 - E_1}{k_2 - k_1} = E'_1$$

and

$$\frac{dE}{dk} = \frac{\Delta E}{\Delta k} = \frac{E_3 - E_2}{k_3 - k_2} = E'_3$$

Now, the second derivative can be written as

$$\frac{d^2E}{dk^2} = \frac{E'_3 - E'_1}{\Delta k} = \frac{E_3 - 2E_2 + E_1}{\Delta k^2}$$

which is the three-point equation we use here. Substitution of energies around the valence maximum yields,

$$\frac{d^2E}{dk^2} = \frac{-0.73940 - 2 * (-0.73928) + (-0.73946)}{(0.34176 - 0.32277)^2} = -0.80975$$

which finally gives the effective mass of an electron

$$m^* = \frac{1}{-0.80975} \approx -1.2$$

Now, the effective mass of the hole is of opposite sign, +1.2. All the values are from our calculations and given in atomic units.

### 3. SUPPLEMENTARY INFORMATION RELATIVE TO THE COMBINED SYSTEMS

All calculations were performed using CRYSTAL09. We utilized B3LYP hybrid functional with the TZVP (dye molecule **1**), 6-31G(d,p) (dye molecules **2-4**), 86411/6411/41 (surface Ni), and 8411/411 (surface O) basis sets. We provide the optimized geometry and the minimum energy of **1a**, **1b** and **2**. The combined system was calculated using only one (1) k-point.

Single point calculations with PBE0 functional were performed to study the band structures of the combined systems (Figures S11–S12). This was done to assess that the results are qualitatively the same despite the chosen functional.

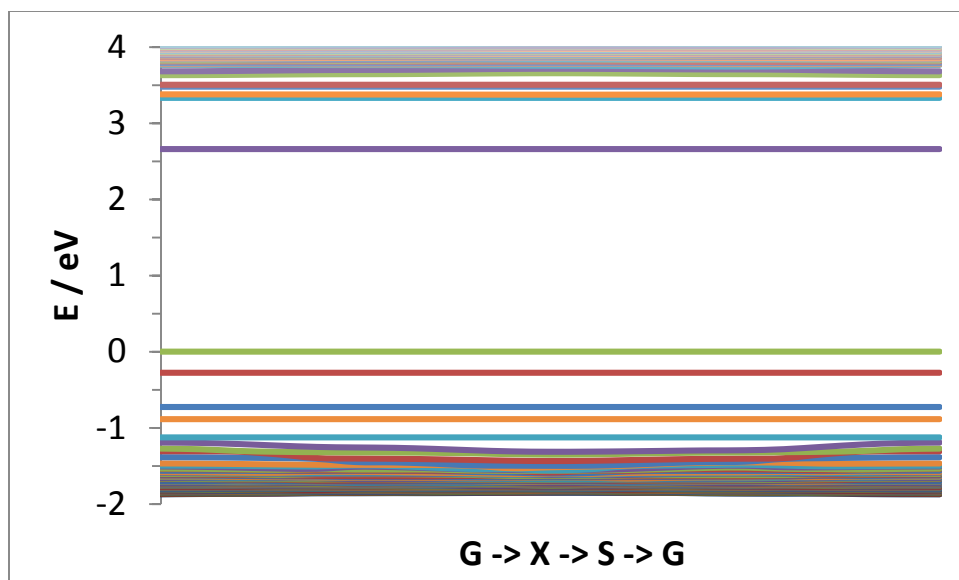

**Fig. S11.** Band structure of combined system **1b** with PBE0 functional.

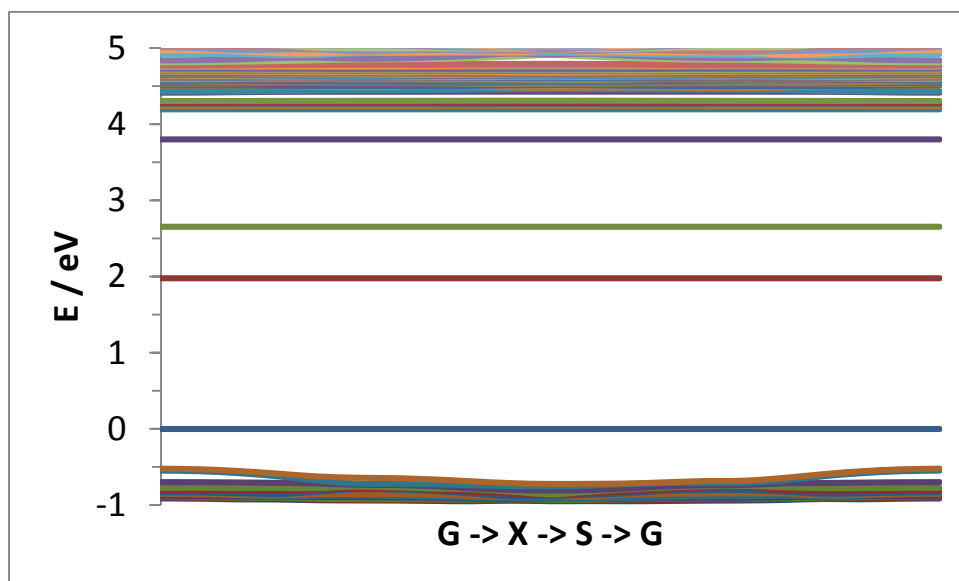

**Fig. S12.** Band structure of combined system **2** with PBE0 functional.

## SUPPLEMENTARY INFORMATION REFERENCES

1. T. Kastinen, M. Niskanen, C. Risko, O. Cramariuc, T. I. Hukka, *J. Phys. Chem. A.*, 2016, **120**, 7, 1051–1064.
2. C.-R. Zhang, J. S. Sears, B. Yang, S. G. Aziz, V. Coropceanu, J.-L. Brédas, *J. Chem. Theory Comput.*, 2014, **10**, 2379–2388.
3. M. Geleijns, C. de Graaf, R. Broer, W. C. Nieuwpoort, *Surface Science*, 1999, **421**, 106–115.
4. D. Ködderitzsch, W. Hergert, W. M. Temmerman, Z. Szotek, A. Ernst, H. Winter, 2002, *Phys. Rev. B.*, **66**, 064434.
5. C. Noguera, W. C. Mackrodt, *J. Phys. Condens. Matter.*, 2000, **12**, 2163–2181.
6. J. Muscat, A. Wander, N. M. Harrison, *Chemical Physics Letters*, 2001, **342**, 397–401.
7. C. Rödl, F. Fuchs, J. Furthmüller, F. Bechstedt, *Phys. Rev. B.*, 2009, **79**, 235114.
8. A. Schrön, M. Granovskij, F. Bechstedt, *J. Phys. Condens. Matter.*, 2013, **25**, 094006.
9. P. A. Cox, *Transition Metal Oxides: An Introduction to their Electronic Structure and Properties*, Clarendon Press, Oxford, 1995.
10. R. Newman, R. M. Chrenko, *Phys. Rev.*, 1959, **114**, 1507–1513.
11. Z. Zhang, Y. Zhao, M. Zhu, *Appl. Phys. Lett.*, 2006, **88**, 3, 033101–3.
12. G. A. Sawatzky, J. W. Allen. *Phys. Rev. Lett.*, 1984, **53**, 2339–2342.

## APPENDIX 1: Coordinates of models

**Table S2.** The coordinates of the NiO bulk.

| Energy / au     |          | -3167.025747 |          |  |
|-----------------|----------|--------------|----------|--|
| Coordinates / Å |          |              |          |  |
|                 | x        | y            | z        |  |
| Ni              | 0.00000  | 0.00000      | 0.00000  |  |
| Ni              | 4.21271  | 4.21271      | 4.21271  |  |
| O               | 2.10635  | 2.10635      | 2.10635  |  |
| O               | -2.10635 | -2.10635     | -2.10635 |  |

**Table S3.** Oligothiophene-trisarylamine perylene monoimide, **1**.

| Energy / au     |          | -4217.371561 |          |  |
|-----------------|----------|--------------|----------|--|
| Coordinates / Å |          |              |          |  |
|                 | x        | y            | z        |  |
| C               | -8.62160 | 0.27036      | -2.16908 |  |
| C               | -7.22842 | 0.15643      | -2.28000 |  |
| C               | -9.23506 | 0.12400      | -0.94884 |  |
| C               | -8.45870 | -0.15877     | 0.19865  |  |
| C               | -7.05088 | -0.29210     | 0.09241  |  |
| C               | -6.42957 | -0.11373     | -1.18192 |  |
| H               | -9.23539 | 0.47894      | -3.04048 |  |
| H               | -6.78799 | 0.28558      | -3.26239 |  |
| C               | -9.09647 | -0.31832     | 1.45043  |  |
| C               | -8.34750 | -0.60528     | 2.56555  |  |
| C               | -6.95568 | -0.74488     | 2.46798  |  |
| C               | -6.29087 | -0.60463     | 1.26172  |  |
| H               | -8.85364 | -0.72208     | 3.51929  |  |
| H               | -6.40710 | -0.96605     | 3.37673  |  |
| C               | -4.95716 | -0.22053     | -1.28398 |  |
| C               | -4.19134 | -0.54991     | -0.12056 |  |
| C               | -4.82451 | -0.76926     | 1.14455  |  |
| C               | -4.29481 | -0.01571     | -2.47567 |  |
| C               | -2.89608 | -0.12062     | -2.57294 |  |
| C               | -2.13121 | -0.44207     | -1.47897 |  |
| C               | -2.77714 | -0.67222     | -0.22237 |  |
| H               | -4.84347 | 0.24194      | -3.37527 |  |
| H               | -2.41083 | 0.06125      | -3.52844 |  |

|   |           |          |          |
|---|-----------|----------|----------|
| C | -2.02746  | -1.04498 | 0.92395  |
| C | -2.65376  | -1.27820 | 2.11789  |
| C | -4.04876  | -1.13392 | 2.22596  |
| H | -4.50594  | -1.32411 | 3.19104  |
| H | -0.95008  | -1.15152 | 0.83638  |
| H | -2.07742  | -1.57207 | 2.99095  |
| C | -10.71056 | 0.25450  | -0.85830 |
| N | -11.27025 | 0.18673  | 0.42280  |
| C | -10.56725 | -0.17860 | 1.58026  |
| O | -11.40987 | 0.42737  | -1.83883 |
| O | -11.14832 | -0.35642 | 2.63328  |
| C | -12.70460 | 0.33175  | 0.53964  |
| C | -13.26109 | 1.59930  | 0.76386  |
| C | -14.65074 | 1.67562  | 0.87713  |
| C | -15.45352 | 0.54822  | 0.77395  |
| C | -14.87378 | -0.69175 | 0.55414  |
| C | -13.49063 | -0.82246 | 0.43333  |
| H | -16.53261 | 0.63833  | 0.87028  |
| H | -15.50335 | -1.57556 | 0.47725  |
| H | -15.10873 | 2.64733  | 1.05115  |
| C | -12.49024 | 2.91549  | 0.84207  |
| C | -12.22465 | 3.48274  | -0.55968 |
| H | -11.57885 | 2.82228  | -1.14640 |
| H | -11.74076 | 4.46405  | -0.48591 |
| H | -13.16049 | 3.60207  | -1.11592 |
| C | -11.21409 | 2.91866  | 1.69342  |
| H | -13.18130 | 3.61144  | 1.33589  |
| H | -11.34814 | 2.36202  | 2.62636  |
| H | -10.95303 | 3.95251  | 1.94636  |
| H | -10.35722 | 2.49588  | 1.15859  |
| C | -12.89012 | -2.19869 | 0.19506  |
| C | -13.16244 | -3.12870 | 1.38248  |
| H | -12.77291 | -2.69266 | 2.30835  |
| H | -12.68271 | -4.10185 | 1.22558  |
| H | -14.23708 | -3.30323 | 1.51312  |
| C | -13.38654 | -2.79375 | -1.12724 |
| H | -11.80356 | -2.09327 | 0.11008  |
| H | -14.47048 | -2.95786 | -1.10992 |
| H | -12.90629 | -3.76096 | -1.31584 |
| H | -13.15730 | -2.12271 | -1.96179 |
| C | -0.65688  | -0.54622 | -1.61635 |
| S | 0.35670   | 0.77181  | -1.13047 |
| C | 1.79344   | -0.06018 | -1.62585 |

|   |          |          |          |
|---|----------|----------|----------|
| C | 1.47662  | -1.29436 | -2.12273 |
| C | 0.07668  | -1.58482 | -2.12617 |
| H | 2.22612  | -1.98627 | -2.49752 |
| C | 3.13130  | 0.50818  | -1.44969 |
| S | 4.41820  | -0.55599 | -0.97358 |
| C | 5.58156  | 0.72413  | -1.00091 |
| C | 4.98312  | 1.89997  | -1.35351 |
| C | 3.58285  | 1.79417  | -1.61859 |
| H | 5.52059  | 2.84260  | -1.41440 |
| C | -0.50032 | -2.89291 | -2.61355 |
| C | -1.09524 | -3.76111 | -1.49515 |
| H | 0.29039  | -3.45267 | -3.12915 |
| H | -1.27919 | -2.69585 | -3.36059 |
| C | -0.10204 | -4.13229 | -0.39550 |
| H | -1.50330 | -4.67732 | -1.94280 |
| H | -1.94787 | -3.23486 | -1.04636 |
| C | -0.76290 | -4.88159 | 0.76002  |
| H | 0.37497  | -3.22094 | -0.00654 |
| H | 0.70898  | -4.74293 | -0.81976 |
| C | 0.21162  | -5.26720 | 1.87135  |
| H | -1.25547 | -5.78775 | 0.37735  |
| H | -1.56298 | -4.25318 | 1.18035  |
| C | -0.47081 | -5.99185 | 3.02891  |
| H | 0.70965  | -4.36171 | 2.24537  |
| H | 1.00554  | -5.90214 | 1.45463  |
| H | -1.24645 | -5.36317 | 3.48248  |
| H | 0.24418  | -6.26077 | 3.81362  |
| H | -0.95328 | -6.91436 | 2.68505  |
| C | 2.75065  | 2.98539  | -2.01319 |
| C | 2.32144  | 3.83729  | -0.81163 |
| H | 1.86180  | 2.65937  | -2.56609 |
| H | 3.33396  | 3.61004  | -2.70291 |
| C | 1.47547  | 5.04247  | -1.21594 |
| H | 3.21578  | 4.17618  | -0.26967 |
| H | 1.75653  | 3.21230  | -0.10587 |
| C | 1.05274  | 5.90223  | -0.02639 |
| H | 0.57976  | 4.69268  | -1.75006 |
| H | 2.03797  | 5.66045  | -1.93152 |
| C | 0.20992  | 7.11301  | -0.42435 |
| H | 1.94864  | 6.24528  | 0.51200  |
| H | 0.48661  | 5.28419  | 0.68578  |
| C | -0.20651 | 7.96190  | 0.77416  |
| H | -0.68452 | 6.76985  | -0.96220 |



|   |          |          |          |
|---|----------|----------|----------|
| H | 0.77685  | 7.73028  | -1.13491 |
| H | -0.80047 | 7.37404  | 1.48390  |
| H | -0.80885 | 8.82350  | 0.46719  |
| H | 0.67110  | 8.34118  | 1.31099  |
| C | 6.99882  | 0.48971  | -0.67836 |
| C | 7.99153  | 1.30507  | -1.23455 |
| C | 9.33069  | 1.10927  | -0.93226 |
| C | 9.71418  | 0.08955  | -0.05829 |
| C | 7.39510  | -0.53463 | 0.18842  |
| C | 8.73305  | -0.73163 | 0.49979  |
| H | 6.64398  | -1.17132 | 0.65066  |
| H | 7.71237  | 2.08411  | -1.93919 |
| H | 10.09128 | 1.74327  | -1.38013 |
| H | 9.02433  | -1.52305 | 1.18516  |
| N | 11.08773 | -0.10963 | 0.25604  |
| C | 11.87474 | 0.99943  | 0.63664  |
| C | 13.21230 | 1.10330  | 0.23057  |
| C | 13.96967 | 2.20057  | 0.60539  |
| C | 13.40973 | 3.22033  | 1.37627  |
| C | 12.07530 | 3.12400  | 1.77400  |
| C | 11.31541 | 2.02213  | 1.41373  |
| H | 13.65004 | 0.32200  | -0.38372 |
| H | 15.00584 | 2.29283  | 0.29291  |
| H | 11.63625 | 3.91075  | 2.37959  |
| H | 10.28078 | 1.94402  | 1.73441  |
| C | 11.63771 | -1.40703 | 0.17347  |
| C | 11.19437 | -2.29807 | -0.81331 |
| C | 12.61784 | -1.82815 | 1.08240  |
| C | 13.15009 | -3.10507 | 0.99615  |
| C | 12.70389 | -3.99138 | 0.01426  |
| C | 11.72066 | -3.57702 | -0.88476 |
| H | 12.95713 | -1.14900 | 1.85890  |
| H | 11.38624 | -4.27293 | -1.64868 |
| H | 10.43885 | -1.97814 | -1.52458 |
| H | 13.90686 | -3.42489 | 1.70571  |
| C | 13.23649 | -5.36943 | -0.11540 |
| C | 14.26700 | 4.37466  | 1.74038  |
| O | 13.61992 | 5.30644  | 2.47221  |
| H | 14.27495 | 6.00102  | 2.64827  |
| O | 15.43013 | 4.49908  | 1.42874  |
| O | 14.18830 | -5.65829 | 0.79727  |
| H | 14.45578 | -6.57360 | 0.61534  |
| O | 12.87610 | -6.17628 | -0.94286 |

---

**Table S4.** Perylene monoimide naphthalene diimide, **2**.

|                 |              |          |          |
|-----------------|--------------|----------|----------|
| Energy / au     | -3418.489257 |          |          |
| Coordinates / Å | x            | y        | z        |
| C               | 0.37500      | -1.92380 | -0.67092 |
| C               | 1.71972      | -1.54068 | -0.75141 |
| C               | -0.62219     | -0.97360 | -0.62990 |
| C               | -0.28831     | 0.40303  | -0.62301 |
| C               | 1.08348      | 0.80826  | -0.66384 |
| C               | 2.11325      | -0.18795 | -0.80918 |
| H               | 0.10706      | -2.97393 | -0.66043 |
| C               | -1.31297     | 1.37855  | -0.58371 |
| C               | -0.99025     | 2.71850  | -0.58422 |
| C               | 0.34887      | 3.12625  | -0.55084 |
| C               | 1.41583      | 2.20379  | -0.54105 |
| H               | -1.78628     | 3.45351  | -0.59741 |
| C               | 3.50205      | 0.25079  | -0.99861 |
| C               | 3.83920      | 1.61383  | -0.70990 |
| C               | 2.83237      | 2.58970  | -0.40839 |
| C               | 4.51872      | -0.59660 | -1.44684 |
| C               | 5.85569      | -0.18249 | -1.53468 |
| C               | 6.20532      | 1.08756  | -1.13590 |
| C               | 5.21569      | 2.02021  | -0.71739 |
| H               | 4.28380      | -1.60483 | -1.74643 |
| H               | 6.60985      | -0.87064 | -1.90139 |
| C               | 5.57740      | 3.32725  | -0.31426 |
| C               | 4.60089      | 4.21544  | 0.07213  |
| C               | 3.24490      | 3.85896  | 0.00631  |
| H               | 2.51032      | 4.59881  | 0.27875  |
| H               | 6.62473      | 3.60546  | -0.31269 |
| H               | 4.86893      | 5.21321  | 0.40753  |
| C               | -2.02552     | -1.42908 | -0.58862 |
| N               | -2.98492     | -0.39095 | -0.56689 |
| C               | -2.74031     | 1.00069  | -0.56720 |
| O               | -2.37637     | -2.59480 | -0.57176 |
| O               | -3.66591     | 1.79146  | -0.55062 |
| O               | 7.49972      | 1.56393  | -1.20698 |
| C               | 8.57761      | 0.77635  | -0.87441 |
| C               | 8.54451      | -0.17475 | 0.15308  |
| C               | 9.70201      | -0.87691 | 0.46559  |
| C               | 10.90416     | -0.63022 | -0.21359 |

|   |          |          |          |
|---|----------|----------|----------|
| C | 10.91616 | 0.32521  | -1.24076 |
| C | 9.76106  | 1.02480  | -1.57481 |
| H | 7.62404  | -0.35879 | 0.69593  |
| H | 9.69726  | -1.62574 | 1.25064  |
| H | 11.81521 | 0.50511  | -1.82607 |
| H | 9.75485  | 1.75655  | -2.37582 |
| C | 12.10299 | -1.43498 | 0.17921  |
| O | 12.03345 | -2.48388 | 0.77557  |
| O | 13.32162 | -0.93332 | -0.16751 |
| H | 13.23010 | -0.01888 | -0.47978 |
| O | 2.67406  | -2.53081 | -0.85053 |
| C | 2.56583  | -3.68318 | -0.08002 |
| C | 2.26257  | -3.64623 | 1.27863  |
| C | 2.24854  | -4.83607 | 2.00966  |
| C | 2.54260  | -6.07295 | 1.41908  |
| C | 2.85188  | -6.06809 | 0.04761  |
| C | 2.86232  | -4.89508 | -0.70167 |
| H | 3.08613  | -7.00104 | -0.45684 |
| H | 3.09840  | -4.90598 | -1.76129 |
| H | 2.00711  | -4.77871 | 3.06492  |
| H | 2.04308  | -2.70055 | 1.76408  |
| C | 2.53543  | -7.39876 | 2.20173  |
| C | 2.19307  | -7.19694 | 3.68994  |
| H | 2.20697  | -8.16408 | 4.20469  |
| H | 1.19470  | -6.76575 | 3.82553  |
| H | 2.91922  | -6.54672 | 4.19118  |
| C | 3.93271  | -8.05740 | 2.11457  |
| H | 4.22136  | -8.26801 | 1.07944  |
| H | 3.94038  | -9.00799 | 2.66162  |
| H | 4.70086  | -7.40840 | 2.55020  |
| C | 1.48103  | -8.35093 | 1.58855  |
| H | 1.69394  | -8.57251 | 0.53736  |
| H | 0.47841  | -7.91175 | 1.64089  |
| H | 1.46470  | -9.30305 | 2.13287  |
| O | 0.62999  | 4.47178  | -0.61979 |
| C | -0.19026 | 5.40594  | 0.00240  |
| C | -0.50176 | 6.55932  | -0.71582 |
| C | -1.24714 | 7.56427  | -0.10542 |
| C | -1.70395 | 7.45317  | 1.21954  |
| C | -1.36954 | 6.28079  | 1.91130  |
| C | -0.61628 | 5.26383  | 1.32096  |
| H | -0.15733 | 6.65573  | -1.74070 |
| H | -0.36788 | 4.36861  | 1.88284  |

|   |           |          |          |
|---|-----------|----------|----------|
| H | -1.69012  | 6.14194  | 2.93744  |
| H | -1.48101  | 8.45241  | -0.68533 |
| C | -2.53500  | 8.58740  | 1.84629  |
| C | -2.92377  | 8.28836  | 3.30671  |
| H | -3.53744  | 7.38417  | 3.39005  |
| H | -3.50958  | 9.12187  | 3.70996  |
| H | -2.04267  | 8.16512  | 3.94699  |
| C | -3.83543  | 8.78152  | 1.03037  |
| H | -4.44047  | 7.86788  | 1.03297  |
| H | -3.62684  | 9.04057  | -0.01307 |
| H | -4.43829  | 9.59057  | 1.46052  |
| C | -1.71624  | 9.90007  | 1.82524  |
| H | -0.79072  | 9.79441  | 2.40269  |
| H | -2.29868  | 10.71958 | 2.26337  |
| H | -1.44267  | 10.19512 | 0.80674  |
| N | -4.31052  | -0.78067 | -0.52224 |
| C | -4.87230  | -0.92853 | 0.76464  |
| C | -6.29880  | -1.34199 | 0.78618  |
| C | -6.99921  | -1.56490 | -0.42707 |
| C | -6.36987  | -1.39951 | -1.68755 |
| C | -4.94666  | -0.98058 | -1.76751 |
| O | -4.21179  | -0.72430 | 1.76343  |
| O | -4.34742  | -0.81452 | -2.81043 |
| C | -6.93619  | -1.50857 | 2.00456  |
| C | -8.28642  | -1.90049 | 2.05375  |
| C | -8.99355  | -2.12568 | 0.88477  |
| C | -8.36462  | -1.96301 | -0.37820 |
| H | -6.37292  | -1.33064 | 2.91431  |
| H | -8.79476  | -2.03291 | 3.00303  |
| C | -9.06395  | -2.18763 | -1.59385 |
| C | -8.42476  | -2.02042 | -2.81068 |
| C | -7.07532  | -1.62509 | -2.85803 |
| H | -8.98569  | -2.19972 | -3.72189 |
| H | -6.56601  | -1.49029 | -3.80622 |
| C | -10.42055 | -2.53960 | 0.95294  |
| N | -11.03695 | -2.74014 | -0.28280 |
| C | -10.49142 | -2.60408 | -1.56013 |
| O | -11.03558 | -2.70050 | 1.99358  |
| O | -11.16374 | -2.81828 | -2.55464 |
| H | -12.01139 | -3.02387 | -0.24818 |

---

**Table S5.** Perylene monoimide phenyl naphthalene diimide, **3**.

|                 |             |          |          |
|-----------------|-------------|----------|----------|
| Energy / au     | -3649.56525 |          |          |
| Coordinates / Å | x           | y        | z        |
| C               | -1.51081    | -1.78270 | -0.91716 |
| C               | -0.70073    | -0.71362 | -0.60017 |
| C               | -1.27623    | 0.55178  | -0.34921 |
| C               | -2.69464    | 0.73059  | -0.41742 |
| C               | -3.54075    | -0.41244 | -0.64397 |
| C               | -2.90387    | -1.63990 | -0.92749 |
| H               | -1.05518    | -2.73860 | -1.14616 |
| C               | -0.43244    | 1.63838  | -0.02796 |
| C               | -0.97894    | 2.87615  | 0.23170  |
| C               | -2.35962    | 3.08170  | 0.11316  |
| C               | -3.24857    | 2.04940  | -0.25413 |
| H               | -0.32574    | 3.69135  | 0.51898  |
| C               | -5.00068    | -0.23946 | -0.57156 |
| C               | -5.53909    | 1.09058  | -0.55411 |
| C               | -4.69338    | 2.24696  | -0.46999 |
| C               | -5.89980    | -1.30813 | -0.52031 |
| C               | -7.28954    | -1.12698 | -0.51519 |
| C               | -7.81312    | 0.14337  | -0.59051 |
| C               | -6.96071    | 1.28157  | -0.62192 |
| H               | -5.53037    | -2.31964 | -0.50102 |
| H               | -7.94531    | -1.99057 | -0.48639 |
| C               | -7.50610    | 2.58386  | -0.71876 |
| C               | -6.66759    | 3.67284  | -0.74387 |
| C               | -5.28085    | 3.50797  | -0.60393 |
| H               | -8.58175    | 2.69861  | -0.78172 |
| H               | -7.07307    | 4.67558  | -0.84433 |
| H               | -4.66351    | 4.39062  | -0.59009 |
| O               | -9.16564    | 0.38728  | -0.71954 |
| C               | -10.10041   | -0.31855 | 0.00354  |
| C               | -11.34525   | -0.49803 | -0.60954 |
| C               | -12.36372   | -1.13671 | 0.08484  |
| C               | -12.15179   | -1.60323 | 1.39046  |
| C               | -10.90071   | -1.41179 | 1.99426  |
| C               | -9.87418    | -0.76941 | 1.30913  |
| H               | -11.49066   | -0.13214 | -1.62067 |
| H               | -13.33617   | -1.28919 | -0.37135 |
| H               | -10.73517   | -1.76061 | 3.00750  |

|   |           |          |          |
|---|-----------|----------|----------|
| H | -8.91025  | -0.61272 | 1.78038  |
| C | -13.27407 | -2.28137 | 2.08156  |
| O | -12.95527 | -2.69411 | 3.33742  |
| H | -13.76188 | -3.11695 | 3.68530  |
| O | -14.37741 | -2.46653 | 1.60603  |
| C | 0.76301   | -0.92813 | -0.54672 |
| N | 1.55296   | 0.19431  | -0.20711 |
| C | 1.03746   | 1.48214  | 0.06430  |
| O | 1.27850   | -2.01172 | -0.77425 |
| O | 1.78005   | 2.40723  | 0.35461  |
| C | 2.98240   | 0.01135  | -0.12430 |
| C | 3.51623   | -0.85876 | 0.82638  |
| C | 4.89407   | -1.03925 | 0.90524  |
| C | 5.73424   | -0.33487 | 0.04451  |
| C | 5.20367   | 0.54054  | -0.90146 |
| C | 3.82453   | 0.70700  | -0.99171 |
| H | 2.85586   | -1.40050 | 1.49394  |
| H | 5.31543   | -1.71630 | 1.64045  |
| N | 7.16828   | -0.51290 | 0.13589  |
| H | 5.86437   | 1.08201  | -1.56985 |
| H | 3.40365   | 1.38523  | -1.72522 |
| C | 7.81002   | -0.03598 | 1.30103  |
| C | 9.28440   | -0.22879 | 1.37647  |
| C | 9.97868   | -0.86538 | 0.31920  |
| C | 9.29033   | -1.32780 | -0.82873 |
| C | 7.81659   | -1.15023 | -0.94577 |
| O | 7.18067   | 0.50241  | 2.19433  |
| O | 7.19363   | -1.53078 | -1.92098 |
| C | 9.97259   | 0.21965  | 2.49242  |
| C | 11.36604  | 0.04630  | 2.58680  |
| C | 12.06725  | -0.57486 | 1.56662  |
| C | 11.38705  | -1.04312 | 0.41171  |
| H | 9.41493   | 0.70401  | 3.28672  |
| H | 11.91320  | 0.39411  | 3.45680  |
| C | 9.98403   | -1.95043 | -1.85396 |
| C | 11.37730  | -2.12852 | -1.76538 |
| C | 12.07308  | -1.68382 | -0.65339 |
| H | 11.92876  | -2.61487 | -2.56326 |
| H | 9.43101   | -2.29519 | -2.72103 |
| C | 13.53914  | -0.75367 | 1.67927  |
| N | 14.14084  | -1.39143 | 0.59295  |
| C | 13.54519  | -1.87736 | -0.57239 |
| H | 15.14615  | -1.51864 | 0.65916  |

|   |          |           |          |
|---|----------|-----------|----------|
| O | 14.20146 | -0.38344  | 2.63395  |
| O | 14.21242 | -2.41567  | -1.43967 |
| O | -3.67481 | -2.71554  | -1.30944 |
| O | -2.87243 | 4.31293   | 0.45532  |
| C | -3.28275 | -4.01776  | -1.02304 |
| C | -3.38208 | -4.95568  | -2.04442 |
| C | -2.89797 | -4.41321  | 0.25999  |
| C | -2.60136 | -5.75213  | 0.49794  |
| C | -2.68819 | -6.72844  | -0.51066 |
| C | -3.08923 | -6.29593  | -1.78178 |
| H | -3.68882 | -4.63216  | -3.03415 |
| H | -2.82857 | -3.68127  | 1.05889  |
| H | -2.29961 | -6.03796  | 1.50149  |
| C | -2.34860 | -8.19558  | -0.19160 |
| H | -3.17483 | -7.00376  | -2.59830 |
| C | -3.29939 | -8.71640  | 0.91267  |
| H | -3.21011 | -8.13485  | 1.83627  |
| H | -3.06742 | -9.76092  | 1.15381  |
| H | -4.34436 | -8.66696  | 0.58587  |
| C | -2.49711 | -9.11017  | -1.42228 |
| H | -3.52371 | -9.11501  | -1.80615 |
| H | -2.24288 | -10.14016 | -1.14836 |
| H | -1.82740 | -8.81098  | -2.23658 |
| C | -0.88624 | -8.28936  | 0.30537  |
| H | -0.72279 | -7.69121  | 1.20803  |
| H | -0.18763 | -7.93433  | -0.46059 |
| H | -0.63118 | -9.32904  | 0.54405  |
| C | -2.16135 | 5.48105   | 0.21008  |
| C | -1.58016 | 5.75668   | -1.02561 |
| C | -2.12981 | 6.43245   | 1.22849  |
| C | -1.50686 | 7.65647   | 1.00196  |
| C | -0.95270 | 6.98772   | -1.22885 |
| C | -0.89928 | 7.96690   | -0.22726 |
| H | -1.61246 | 5.01869   | -1.82132 |
| H | -2.59306 | 6.20309   | 2.18300  |
| H | -1.49162 | 8.38164   | 1.81050  |
| H | -0.50513 | 7.17419   | -2.19843 |
| C | -0.21182 | 9.33040   | -0.42251 |
| C | 0.94513  | 9.47099   | 0.59568  |
| H | 0.58871  | 9.40576   | 1.62915  |
| H | 1.44340  | 10.44076  | 0.47557  |
| H | 1.69344  | 8.68364   | 0.45069  |
| C | 0.37258  | 9.49357   | -1.83846 |

|   |          |          |          |
|---|----------|----------|----------|
| H | 1.13528  | 8.73715  | -2.05549 |
| H | 0.84923  | 10.47599 | -1.92904 |
| H | -0.40303 | 9.43128  | -2.61053 |
| C | -1.23824 | 10.46498 | -0.19229 |
| H | -1.66215 | 10.43477 | 0.81697  |
| H | -2.06735 | 10.39404 | -0.90552 |
| H | -0.75996 | 11.44329 | -0.32253 |

---



**Table S6.** Perylene monoimide phenyl fullerene, **4**.

| Energy / au -5086.177853 |          |          |          |
|--------------------------|----------|----------|----------|
| Coordinates / Å          | x        | y        | z        |
| C                        | 9.31636  | 0.97752  | -1.86942 |
| C                        | 10.14918 | 1.18021  | -0.76713 |
| C                        | 10.70347 | 0.06881  | -0.09155 |
| C                        | 10.73491 | 0.04647  | 1.30622  |
| C                        | 10.21406 | 1.13960  | 2.04263  |
| C                        | 9.66965  | 2.23815  | 1.37012  |
| C                        | 9.63677  | 2.25530  | -0.04249 |
| C                        | 8.49226  | 2.70620  | -0.70413 |
| C                        | 8.29270  | 1.90683  | -1.81382 |
| C                        | 9.03295  | -0.31528 | -2.32111 |
| C                        | 9.58072  | -1.41408 | -1.66594 |
| C                        | 10.42172 | -1.22422 | -0.53944 |
| C                        | 10.28542 | -2.04866 | 0.57913  |
| C                        | 10.47627 | -1.26308 | 1.72143  |
| C                        | 9.69560  | -1.49674 | 2.87951  |
| C                        | 9.18151  | -0.41737 | 3.60637  |
| C                        | 9.44157  | 0.90890  | 3.18438  |
| C                        | 8.42073  | 1.86571  | 3.21585  |
| C                        | 8.56000  | 2.68281  | 2.09301  |
| C                        | 7.40778  | 3.14594  | 1.40683  |
| C                        | 7.37961  | 3.15293  | 0.01658  |
| C                        | 6.08753  | 2.82563  | -0.41556 |
| C                        | 5.85356  | 2.10395  | -1.62575 |
| C                        | 6.98232  | 1.57939  | -2.25101 |
| C                        | 6.69700  | 0.34083  | -2.81020 |
| C                        | 7.73856  | -0.63667 | -2.74723 |
| C                        | 7.48330  | -1.94218 | -2.33847 |
| C                        | 8.62433  | -2.42251 | -1.66880 |
| C                        | 8.49182  | -3.26119 | -0.53775 |
| C                        | 9.31458  | -3.07644 | 0.58021  |
| C                        | 8.54697  | -3.30980 | 1.72470  |
| C                        | 8.73778  | -2.51476 | 2.88210  |
| C                        | 7.63207  | -2.06512 | 3.61136  |
| C                        | 7.90621  | -0.76845 | 4.05790  |
| C                        | 6.87449  | 0.20262  | 4.08980  |
| C                        | 7.13008  | 1.51042  | 3.66953  |
| C                        | 5.99747  | 1.97626  | 2.99009  |

|   |          |          |          |
|---|----------|----------|----------|
| C | 6.13655  | 2.79951  | 1.84913  |
| C | 5.31714  | 2.60208  | 0.72125  |
| C | 4.35195  | 1.57761  | 0.72685  |
| C | 4.05554  | 0.83491  | -0.43060 |
| C | 4.61428  | 1.20640  | -1.82310 |
| C | 5.21762  | -0.02718 | -2.62929 |
| C | 5.12630  | -1.39239 | -1.92319 |
| C | 6.20138  | -2.29726 | -1.88068 |
| C | 6.08256  | -3.10876 | -0.75448 |
| C | 7.22401  | -3.60361 | -0.08364 |
| C | 7.25468  | -3.64032 | 1.31240  |
| C | 6.13861  | -3.18587 | 2.04930  |
| C | 6.32373  | -2.40522 | 3.19209  |
| C | 5.31006  | -1.44472 | 3.22137  |
| C | 5.58628  | -0.13569 | 3.67215  |
| C | 5.05128  | 0.95958  | 2.98942  |
| C | 4.24003  | 0.75850  | 1.84958  |
| C | 3.97442  | -0.52024 | 1.40707  |
| C | 4.50757  | -1.63174 | 2.09495  |
| C | 5.01615  | -2.70093 | 1.37537  |
| C | 4.99447  | -2.66132 | -0.03388 |
| C | 4.44421  | -1.57253 | -0.71879 |
| C | 3.92481  | -0.48784 | 0.00984  |
| H | -5.06733 | -5.20687 | 1.85643  |
| H | -2.20938 | -8.56183 | 0.33275  |
| H | -3.98325 | -7.26394 | 1.14490  |
| C | -4.87851 | -5.37066 | 0.80226  |
| C | -4.25558 | -6.54761 | 0.38529  |
| H | 5.77935  | 2.34543  | -4.44700 |
| H | -3.83105 | -9.36226 | 0.22111  |
| C | -2.93800 | -9.04079 | -0.35719 |
| O | -5.84338 | -3.26559 | 0.29841  |
| H | 4.98746  | 1.72257  | -5.94159 |
| C | 4.80725  | 2.17880  | -4.94473 |
| C | -5.24126 | -4.39848 | -0.12812 |
| N | 3.90500  | 1.32105  | -4.16046 |
| C | -4.00307 | -6.78151 | -0.98865 |
| H | -2.45969 | -9.95624 | -0.76734 |
| H | -3.51955 | -2.52724 | -0.49106 |
| H | -6.09562 | 8.97952  | 2.67716  |
| O | -1.70346 | -1.13698 | -1.22621 |
| C | 4.44104  | -0.03110 | -3.94127 |
| C | -4.24455 | -1.72352 | -0.47686 |

|   |           |          |          |
|---|-----------|----------|----------|
| C | -5.56283  | -2.00607 | -0.11455 |
| C | -3.33357  | -8.07237 | -1.49715 |
| H | -0.21338  | 2.66934  | -0.16073 |
| C | -10.62400 | 1.95442  | 1.06615  |
| H | -7.62356  | 9.52790  | 1.90536  |
| H | -1.33331  | -7.17629 | -1.61536 |
| C | -2.48542  | -0.20078 | -1.15180 |
| C | -9.33218  | 2.23216  | 0.61017  |
| H | -11.24267 | 2.79603  | 1.34595  |
| C | -3.82985  | -0.43798 | -0.77650 |
| H | 2.16012   | 2.95030  | -0.74947 |
| C | 0.18391   | 2.14677  | -1.02098 |
| H | -9.09463  | 3.27128  | 0.58220  |
| C | -6.51731  | 9.64153  | 1.89227  |
| C | 1.54147   | 2.29754  | -1.35284 |
| C | -6.55166  | -0.96512 | -0.06887 |
| C | -11.10812 | 0.64547  | 1.19426  |
| C | -4.99716  | -4.61069 | -1.48885 |
| C | -4.39172  | -5.78914 | -1.91632 |
| C | -8.39747  | 1.20818  | 0.28761  |
| C | -2.04826  | -7.71414 | -2.27493 |
| C | -8.84455  | -0.13556 | 0.43722  |
| C | -6.11946  | 0.37657  | -0.30174 |
| C | -10.21768 | -0.41339 | 0.81646  |
| C | -7.94493  | -1.22056 | 0.20154  |
| C | -4.74619  | 0.62076  | -0.67114 |
| H | -1.55167  | -8.63162 | -2.65739 |
| H | 4.32553   | 3.16442  | -5.11968 |
| H | -6.26983  | 10.68821 | 2.16987  |
| N | -2.04132  | 1.08374  | -1.39950 |
| C | -0.64369  | 1.29358  | -1.77041 |
| C | -7.03683  | 1.47227  | -0.17359 |
| C | -10.66927 | -1.74304 | 0.75760  |
| C | 2.09990   | 1.62764  | -2.46265 |
| C | -8.48609  | -2.53579 | 0.20917  |
| C | -4.28780  | 1.91989  | -0.93457 |
| C | 3.58764   | 1.85913  | -2.81579 |
| C | -9.81919  | -2.77201 | 0.44989  |
| C | -2.92355  | 2.14471  | -1.28705 |
| C | -6.54140  | 2.78307  | -0.50833 |
| C | -0.09200  | 0.62108  | -2.87551 |
| C | 1.25110   | 0.80406  | -3.23438 |
| H | -5.24351  | -9.07971 | -1.87533 |

|   |           |          |          |
|---|-----------|----------|----------|
| C | -6.18254  | 5.46994  | 0.73285  |
| C | -5.19154  | 2.97312  | -0.86923 |
| H | -5.80662  | 4.69257  | 1.38569  |
| C | -4.31552  | -8.81503 | -2.42793 |
| H | -7.93974  | -3.41372 | -0.03803 |
| H | -5.28955  | -3.86446 | -2.21717 |
| C | -5.84974  | 6.79711  | 0.98658  |
| H | -10.20354 | -3.78310 | 0.39488  |
| H | -5.21726  | 7.01061  | 1.83623  |
| O | -2.53663  | 3.28058  | -1.52100 |
| C | -7.01470  | 5.14293  | -0.34333 |
| H | -4.22712  | -5.92370 | -2.97588 |
| C | -6.33286  | 7.83668  | 0.16204  |
| O | -7.36819  | 3.85553  | -0.57727 |
| H | -0.71354  | -0.03008 | -3.47701 |
| C | -7.50369  | 6.15516  | -1.17139 |
| C | -5.96251  | 9.29587  | 0.49324  |
| C | -7.16166  | 7.48967  | -0.93328 |
| H | -3.93852  | 8.79887  | 1.23378  |
| H | -3.86019  | -9.75144 | -2.81537 |
| H | 1.61451   | 0.28964  | -4.11024 |
| H | -2.26285  | -7.06752 | -3.15094 |
| H | -4.85055  | 3.96747  | -1.13028 |
| H | -8.14487  | 5.90729  | -2.00880 |
| H | -7.55991  | 8.23656  | -1.60337 |
| C | -4.42679  | 9.45982  | 0.48803  |
| H | -4.60103  | -8.19473 | -3.30298 |
| H | -7.65848  | 10.26969 | -0.52578 |
| H | -4.14304  | 10.50444 | 0.74028  |
| C | -6.54819  | 10.31654 | -0.51102 |
| H | -6.26341  | 11.35312 | -0.22771 |
| H | -4.01346  | 9.21600  | -0.51429 |
| H | -6.16095  | 10.12986 | -1.53615 |
| H | 5.00441   | -0.45530 | -4.80238 |
| H | 3.56223   | -0.69334 | -3.80099 |
| H | 3.68632   | 2.96986  | -2.80833 |
| H | -11.69544 | -2.01553 | 0.89425  |
| C | -12.52748 | 0.43631  | 1.76415  |
| C | -13.53665 | 1.41190  | 1.57079  |
| C | -12.88060 | -0.70106 | 2.54331  |
| C | -14.83505 | 1.23051  | 2.07538  |
| C | -15.17714 | 0.07086  | 2.78338  |
| C | -14.18572 | -0.88964 | 3.01916  |

|   |           |          |         |
|---|-----------|----------|---------|
| H | -13.34002 | 2.31262  | 1.01108 |
| H | -15.58222 | 1.99303  | 1.89548 |
| H | -12.15421 | -1.45117 | 2.81331 |
| H | -14.41570 | -1.78425 | 3.58840 |
| C | -16.56601 | -0.12388 | 3.28737 |
| O | -17.46574 | 0.88222  | 3.20505 |
| O | -16.90046 | -1.19171 | 3.78188 |
| H | -18.36333 | 0.78611  | 3.55631 |

---

**Table S7.** Oligothiophene-trisarylamine perylene monoimide, **1** (two binding points) with NiO (100) surface.

| Energy / au     | -206904.407890 |           |         |
|-----------------|----------------|-----------|---------|
| Coordinates / Å | x              | y         | z       |
| Ni              | -0.05007       | -4.83708  | 3.30022 |
| Ni              | -5.94565       | 1.15564   | 3.12673 |
| Ni              | 6.02758        | 1.13139   | 3.18381 |
| Ni              | 0.01583        | 7.12630   | 3.12951 |
| Ni              | -0.01405       | -1.83118  | 3.12484 |
| Ni              | -5.94129       | 4.11551   | 3.12794 |
| Ni              | 6.01438        | 4.20903   | 3.17138 |
| Ni              | 0.02393        | 10.10271  | 3.12865 |
| Ni              | -0.02197       | 1.17245   | 3.12324 |
| Ni              | 6.02560        | -4.87014  | 3.13825 |
| Ni              | -5.92818       | -4.76906  | 3.15288 |
| Ni              | 0.02444        | -10.75024 | 3.13103 |
| Ni              | 0.02450        | 4.17375   | 3.29496 |
| Ni              | 6.03407        | -1.77321  | 3.15370 |
| Ni              | -5.94382       | -1.81093  | 3.13463 |
| Ni              | 0.00526        | -7.77570  | 3.13151 |
| Ni              | -2.97785       | 1.15677   | 3.12586 |
| Ni              | 2.89952        | -4.87459  | 3.14496 |
| Ni              | 2.99577        | 7.14636   | 3.12997 |
| Ni              | 8.97831        | 1.17307   | 3.13729 |
| Ni              | 2.92528        | -1.77078  | 3.14368 |
| Ni              | -2.95018       | 4.13495   | 3.13036 |
| Ni              | -2.95522       | -7.76132  | 3.13810 |
| Ni              | -8.91948       | -1.80948  | 3.12907 |
| Ni              | 2.92494        | 1.12553   | 3.14313 |
| Ni              | -2.94595       | 7.11712   | 3.13006 |
| Ni              | -2.91792       | -4.78070  | 3.42384 |
| Ni              | -8.91991       | 1.15740   | 3.12823 |
| Ni              | -2.97503       | -1.82794  | 3.13362 |
| Ni              | 2.98778        | -7.80450  | 3.12569 |
| Ni              | 2.86770        | 4.22944   | 3.35096 |
| Ni              | 8.97843        | -1.81822  | 3.13206 |
| O               | -4.46303       | -0.31840  | 3.14947 |
| O               | 1.51983        | -6.33579  | 3.11444 |
| O               | 1.50250        | 5.71368   | 3.07148 |
| O               | 7.47295        | -0.33170  | 3.16268 |

|    |           |          |         |
|----|-----------|----------|---------|
| O  | 1.55786   | -3.28794 | 3.14805 |
| O  | -4.46188  | 2.65522  | 3.14751 |
| O  | 7.45330   | 2.64139  | 3.18341 |
| O  | 1.49987   | 8.63063  | 3.14519 |
| O  | 1.48940   | -0.33295 | 3.14349 |
| O  | -4.45433  | 5.62220  | 3.14363 |
| O  | -4.45899  | -6.28894 | 3.16929 |
| O  | -10.41540 | -0.32603 | 3.14525 |
| O  | 1.50216   | 2.58576  | 3.09339 |
| O  | 7.43750   | -3.30998 | 3.17318 |
| O  | -4.47511  | -3.28281 | 3.14764 |
| O  | 1.50488   | -9.27730 | 3.14688 |
| O  | -1.48176  | -0.32220 | 3.14778 |
| O  | 4.48143   | -6.27260 | 3.16882 |
| O  | 4.49297   | 5.63682  | 3.17489 |
| O  | 10.43792  | -0.33042 | 3.15238 |
| O  | -1.50664  | 2.63907  | 3.12979 |
| O  | 4.49860   | -3.30877 | 3.60699 |
| O  | -7.43672  | -3.29364 | 3.15336 |
| O  | -1.47412  | -9.28074 | 3.14963 |
| O  | 4.48612   | -0.34599 | 3.20067 |
| O  | -1.50211  | 5.65766  | 3.12449 |
| O  | -1.49148  | -6.34955 | 3.08342 |
| O  | -7.43927  | -0.32116 | 3.14806 |
| O  | -1.47331  | -3.25366 | 3.08596 |
| O  | -7.43196  | 2.65105  | 3.14997 |
| O  | 4.52720   | 2.59608  | 3.56971 |
| O  | -1.48250  | 8.61851  | 3.15048 |
| Ni | -4.45722  | -0.33841 | 1.04892 |
| Ni | 1.48011   | -6.29682 | 1.05105 |
| Ni | 1.50084   | 5.62341  | 1.05403 |
| Ni | 7.46430   | -0.32750 | 1.05404 |
| Ni | 1.48267   | -3.32626 | 1.07071 |
| Ni | -4.45306  | 2.64169  | 1.04683 |
| Ni | 7.45522   | 2.65259  | 1.07460 |
| Ni | 1.50408   | 8.60444  | 1.04907 |
| Ni | 1.48831   | -0.32891 | 1.04332 |
| Ni | -4.44468  | 5.61885  | 1.04527 |
| Ni | -4.43693  | -6.26559 | 1.08656 |
| Ni | -10.41205 | -0.33362 | 1.04631 |
| Ni | 1.49148   | 2.66902  | 1.07143 |
| Ni | 7.45964   | -3.31596 | 1.05600 |
| Ni | -4.43906  | -3.32582 | 1.07535 |

|    |          |           |         |
|----|----------|-----------|---------|
| Ni | 1.49984  | -9.27281  | 1.04639 |
| Ni | -1.48496 | -0.33980  | 1.04982 |
| Ni | 4.47624  | -6.29736  | 1.05639 |
| Ni | 4.47112  | 5.62595   | 1.09032 |
| Ni | 10.44171 | -0.33123  | 1.05047 |
| Ni | -1.47034 | 2.65492   | 1.05855 |
| Ni | 4.47629  | -3.30841  | 0.96770 |
| Ni | -7.42708 | -3.30897  | 1.05438 |
| Ni | -1.47826 | -9.26407  | 1.05219 |
| Ni | 4.48114  | -0.32685  | 1.07386 |
| Ni | -1.46608 | 5.61822   | 1.05603 |
| Ni | -1.48965 | -6.27081  | 1.06615 |
| Ni | -7.43320 | -0.33521  | 1.04685 |
| Ni | -1.48696 | -3.33611  | 1.06477 |
| Ni | -7.43414 | 2.64004   | 1.04379 |
| Ni | 4.46066  | 2.66950   | 1.00301 |
| Ni | -1.47453 | 8.60338   | 1.04728 |
| O  | 0.02744  | -4.80548  | 1.05807 |
| O  | -5.94713 | 1.15915   | 1.04438 |
| O  | 5.93886  | 1.17271   | 1.11286 |
| O  | 0.00342  | 7.12958   | 1.03745 |
| O  | 0.02929  | -1.81460  | 1.04290 |
| O  | -5.94783 | 4.14144   | 1.04848 |
| O  | 5.94057  | 4.10140   | 1.10668 |
| O  | 0.00583  | 10.09582  | 1.04576 |
| O  | 0.01161  | 1.14597   | 1.04068 |
| O  | 5.92879  | -4.78108  | 1.06956 |
| O  | -5.94791 | -4.80873  | 1.06525 |
| O  | 0.00863  | -10.76268 | 1.04769 |
| O  | 0.00486  | 4.14122   | 1.05639 |
| O  | 5.94061  | -1.84948  | 1.10020 |
| O  | -5.94765 | -1.81991  | 1.04739 |
| O  | 0.01352  | -7.79572  | 1.03997 |
| O  | -2.96953 | 1.15712   | 1.04184 |
| O  | 3.02593  | -4.77448  | 1.08582 |
| O  | 2.99889  | 7.12502   | 1.04375 |
| O  | 8.93648  | 1.14886   | 1.05989 |
| O  | 3.03038  | -1.84318  | 1.08826 |
| O  | -2.97493 | 4.13895   | 1.04348 |
| O  | -2.98460 | -7.79681  | 1.05327 |
| O  | -8.92525 | -1.81926  | 1.04490 |
| O  | 3.02632  | 1.16427   | 1.08658 |
| O  | -2.98184 | 7.12289   | 1.05039 |



|    |          |           |          |
|----|----------|-----------|----------|
| O  | -2.97412 | -4.80290  | 1.03739  |
| O  | -8.92383 | 1.15640   | 1.04509  |
| O  | -2.97113 | -1.81368  | 1.04127  |
| O  | 2.99660  | -7.78092  | 1.04480  |
| O  | 3.01690  | 4.11756   | 1.10286  |
| O  | 8.93260  | -1.82133  | 1.05733  |
| Ni | 0.00627  | -4.80642  | -1.05330 |
| Ni | -5.94474 | 1.14959   | -1.06917 |
| Ni | 5.96756  | 1.15662   | -1.05293 |
| Ni | 0.01283  | 7.11057   | -1.06429 |
| Ni | 0.00578  | -1.83130  | -1.05871 |
| Ni | -5.94676 | 4.12881   | -1.06672 |
| Ni | 5.97299  | 4.14337   | -1.04518 |
| Ni | 0.01290  | 10.08957  | -1.06646 |
| Ni | 0.00776  | 1.15573   | -1.06039 |
| Ni | 5.97176  | -4.81210  | -1.07389 |
| Ni | -5.94530 | -4.80437  | -1.04632 |
| Ni | 0.01111  | -10.76218 | -1.06573 |
| Ni | 0.00994  | 4.13278   | -1.05546 |
| Ni | 5.97085  | -1.82104  | -1.06668 |
| Ni | -5.94214 | -1.82932  | -1.06142 |
| Ni | 0.00674  | -7.78317  | -1.06249 |
| Ni | -2.96627 | 1.15125   | -1.06456 |
| Ni | 2.98257  | -4.81144  | -1.06734 |
| Ni | 2.99380  | 7.11261   | -1.05699 |
| Ni | 8.94716  | 1.15748   | -1.05648 |
| Ni | 2.98221  | -1.82240  | -1.06397 |
| Ni | -2.96463 | 4.13029   | -1.06561 |
| Ni | -2.96952 | -7.77947  | -1.05043 |
| Ni | -8.92256 | -1.82671  | -1.06640 |
| Ni | 2.98465  | 1.15509   | -1.05751 |
| Ni | -2.96471 | 7.10940   | -1.06474 |
| Ni | -2.96989 | -4.80508  | -1.05334 |
| Ni | -8.92422 | 1.15087   | -1.06925 |
| Ni | -2.96877 | -1.83124  | -1.05976 |
| Ni | 2.98807  | -7.78699  | -1.06648 |
| Ni | 2.98557  | 4.14164   | -1.05021 |
| Ni | 8.94854  | -1.82611  | -1.06170 |
| O  | -4.45677 | -0.33343  | -1.07252 |
| O  | 1.50644  | -6.29009  | -1.06344 |
| O  | 1.50403  | 5.61961   | -1.06231 |
| O  | 7.44448  | -0.33620  | -1.04230 |
| O  | 1.51319  | -3.31323  | -1.05702 |

|    |           |          |          |
|----|-----------|----------|----------|
| O  | -4.45759  | 2.64704  | -1.07081 |
| O  | 7.44551   | 2.63751  | -1.04528 |
| O  | 1.49933   | 8.60284  | -1.07029 |
| O  | 1.51340   | -0.33533 | -1.05349 |
| O  | -4.46369  | 5.62697  | -1.06512 |
| O  | -4.46494  | -6.30153 | -1.04909 |
| O  | -10.41624 | -0.33497 | -1.07051 |
| O  | 1.50975   | 2.64380  | -1.05519 |
| O  | 7.44686   | -3.31022 | -1.05534 |
| O  | -4.45979  | -3.31547 | -1.06562 |
| O  | 1.50039   | -9.27265 | -1.07045 |
| O  | -1.47449  | -0.33580 | -1.06999 |
| O  | 4.47727   | -6.28690 | -1.06551 |
| O  | 4.48004   | 5.61393  | -1.04777 |
| O  | 10.42985  | -0.33546 | -1.06309 |
| O  | -1.47726  | 2.64526  | -1.06861 |
| O  | 4.48079   | -3.31206 | -1.06677 |
| O  | -7.43453  | -3.31443 | -1.06645 |
| O  | -1.48386  | -9.27554 | -1.06305 |
| O  | 4.48244   | -0.33751 | -1.04276 |
| O  | -1.48133  | 5.62578  | -1.06883 |
| O  | -1.47804  | -6.29671 | -1.06722 |
| O  | -7.43567  | -0.33488 | -1.07186 |
| O  | -1.47404  | -3.31491 | -1.06882 |
| O  | -7.43473  | 2.64537  | -1.07116 |
| O  | 4.48080   | 2.63877  | -1.04759 |
| O  | -1.48455  | 8.60539  | -1.06753 |
| Ni | -4.45589  | -0.34801 | -3.14600 |
| Ni | 1.49448   | -6.30360 | -3.14218 |
| Ni | 1.50181   | 5.61399  | -3.13843 |
| Ni | 7.45775   | -0.34016 | -3.13366 |
| Ni | 1.49446   | -3.32475 | -3.13820 |
| Ni | -4.45559  | 2.63108  | -3.14656 |
| Ni | 7.45672   | 2.63982  | -3.12825 |
| Ni | 1.50344   | 8.59083  | -3.14433 |
| Ni | 1.49625   | -0.34304 | -3.13754 |
| Ni | -4.45693  | 5.60824  | -3.14779 |
| Ni | -4.45766  | -6.29910 | -3.13026 |
| Ni | -10.41654 | -0.34721 | -3.14882 |
| Ni | 1.49972   | 2.63826  | -3.13418 |
| Ni | 7.45936   | -3.32382 | -3.14158 |
| Ni | -4.45712  | -3.32566 | -3.13893 |
| Ni | 1.49812   | -9.28209 | -3.14637 |

|    |          |           |          |
|----|----------|-----------|----------|
| Ni | -1.47974 | -0.34681  | -3.14228 |
| Ni | 4.47534  | -6.30731  | -3.14692 |
| Ni | 4.48057  | 5.61610   | -3.12937 |
| Ni | 10.43480 | -0.34393  | -3.14212 |
| Ni | -1.47687 | 2.63387   | -3.14320 |
| Ni | 4.47599  | -3.32385  | -3.14768 |
| Ni | -7.43277 | -3.32481  | -3.14045 |
| Ni | -1.48163 | -9.27851  | -3.13921 |
| Ni | 4.47690  | -0.34067  | -3.13310 |
| Ni | -1.47658 | 5.61141   | -3.14457 |
| Ni | -1.48212 | -6.30041  | -3.13829 |
| Ni | -7.43517 | -0.34832  | -3.14837 |
| Ni | -1.48153 | -3.32604  | -3.14007 |
| Ni | -7.43586 | 2.63144   | -3.14759 |
| Ni | 4.47855  | 2.64051   | -3.13120 |
| Ni | -1.47608 | 8.59206   | -3.14349 |
| O  | 0.01389  | -4.81140  | -3.16661 |
| O  | -5.94587 | 1.14711   | -3.17572 |
| O  | 5.96538  | 1.14521   | -3.15020 |
| O  | 0.01073  | 7.10405   | -3.17029 |
| O  | 0.01713  | -1.83208  | -3.16509 |
| O  | -5.94680 | 4.12960   | -3.17213 |
| O  | 5.96613  | 4.12048   | -3.15026 |
| O  | 0.00728  | 10.08455  | -3.17156 |
| O  | 0.01739  | 1.14584   | -3.16451 |
| O  | 5.96944  | -4.80511  | -3.16637 |
| O  | -5.94774 | -4.81724  | -3.15915 |
| O  | 0.00893  | -10.76713 | -3.16717 |
| O  | 0.01379  | 4.12471   | -3.16704 |
| O  | 5.96579  | -1.82967  | -3.15922 |
| O  | -5.94630 | -1.83479  | -3.17279 |
| O  | 0.00852  | -7.79074  | -3.16921 |
| O  | -2.96490 | 1.14737   | -3.17315 |
| O  | 2.99322  | -4.80758  | -3.16578 |
| O  | 2.99096  | 7.10051   | -3.16486 |
| O  | 8.94067  | 1.14541   | -3.15682 |
| O  | 2.99349  | -1.83056  | -3.16015 |
| O  | -2.96774 | 4.12864   | -3.17155 |
| O  | -2.97380 | -7.79407  | -3.15878 |
| O  | -8.92607 | -1.83314  | -3.17308 |
| O  | 2.99440  | 1.14580   | -3.15452 |
| O  | -2.96928 | 7.10909   | -3.16562 |
| O  | -2.97008 | -4.81559  | -3.16746 |

|   |          |          |          |
|---|----------|----------|----------|
| O | -8.92457 | 1.14805  | -3.17237 |
| O | -2.96568 | -1.83452 | -3.17102 |
| O | 2.98867  | -7.78778 | -3.17264 |
| O | 2.99381  | 4.12192  | -3.15642 |
| O | 8.93963  | -1.82927 | -3.16280 |
| C | -1.32146 | -4.39752 | 5.84389  |
| O | -2.51862 | -4.51153 | 5.43566  |
| H | -3.06175 | -3.22735 | 7.63698  |
| C | -2.02891 | -2.95683 | 7.81613  |
| C | -1.03404 | -3.54875 | 7.04643  |
| C | 0.29375  | -3.20605 | 7.28521  |
| H | 1.05744  | -3.68888 | 6.69340  |
| H | 1.64171  | -1.92176 | 8.34934  |
| C | 0.61517  | -2.23406 | 8.20115  |
| C | -0.38689 | -1.57782 | 8.90256  |
| C | -1.71080 | -1.98652 | 8.75077  |
| H | -2.48731 | -1.48826 | 9.31791  |
| N | -0.01275 | -0.38350 | 9.60460  |
| H | -1.27029 | 0.29069  | 7.41129  |
| C | -0.37641 | 0.88108  | 7.56181  |
| C | 0.39153  | 0.66180  | 8.70058  |
| C | 1.55073  | 1.40536  | 8.89448  |
| H | 2.15215  | 1.22848  | 9.77775  |
| H | -0.61215 | 2.02315  | 5.77326  |
| C | -0.00107 | 1.83066  | 6.64600  |
| C | 1.16046  | 2.57716  | 6.82814  |
| C | 1.93637  | 2.35168  | 7.95656  |
| C | 1.45569  | 3.58254  | 5.75961  |
| H | 2.84404  | 2.92414  | 8.10634  |
| O | 2.66247  | 3.76480  | 5.36480  |
| O | 0.43442  | 4.14225  | 5.27258  |
| C | -8.66632 | 0.53740  | 27.42543 |
| C | -8.18285 | 0.65816  | 26.13075 |
| C | -8.51524 | -0.63832 | 28.12082 |
| C | -7.83838 | -1.72079 | 27.52524 |
| C | -7.32776 | -1.59737 | 26.20614 |
| C | -7.53961 | -0.38713 | 25.49041 |
| H | -9.17207 | 1.36291  | 27.90847 |
| H | -8.31456 | 1.60486  | 25.62532 |
| C | -7.68635 | -2.93296 | 28.22653 |
| C | -7.03220 | -3.98577 | 27.63311 |
| C | -6.50462 | -3.85973 | 26.35610 |
| C | -6.61611 | -2.68608 | 25.63043 |

|   |          |          |          |
|---|----------|----------|----------|
| H | -6.93410 | -4.91131 | 28.18478 |
| H | -5.99903 | -4.71532 | 25.93056 |
| C | -7.07821 | -0.29075 | 24.10381 |
| C | -6.29865 | -1.34543 | 23.55125 |
| C | -6.02972 | -2.52932 | 24.29617 |
| C | -7.38428 | 0.79061  | 23.30438 |
| C | -6.92011 | 0.89242  | 21.99580 |
| C | -6.12358 | -0.07942 | 21.44468 |
| C | -5.78937 | -1.22333 | 22.22696 |
| H | -8.01047 | 1.58659  | 23.68365 |
| H | -7.18414 | 1.75708  | 21.39871 |
| C | -4.98996 | -2.25865 | 21.69895 |
| C | -4.71181 | -3.36849 | 22.44285 |
| C | -5.23256 | -3.50241 | 23.72954 |
| H | -4.98770 | -4.39609 | 24.28705 |
| H | -4.60012 | -2.14959 | 20.69679 |
| H | -4.08441 | -4.15328 | 22.03745 |
| C | -9.03810 | -0.74086 | 29.49246 |
| N | -8.73448 | -1.92216 | 30.18825 |
| C | -8.20949 | -3.08154 | 29.59330 |
| O | -9.68468 | 0.15130  | 30.02489 |
| O | 3.73793  | 7.77533  | 30.20628 |
| C | -9.08790 | -1.98665 | 31.59764 |
| C | -8.13004 | -1.60987 | 32.54505 |
| C | -8.50502 | -1.68490 | 33.88075 |
| C | -9.76178 | -2.10976 | 34.25898 |
| C | 1.23301  | 9.44187  | 33.30101 |
| C | 1.54972  | 9.49510  | 31.94972 |
| H | 1.89213  | 9.75882  | 35.31021 |
| H | 0.24722  | 9.10934  | 33.60369 |
| H | -7.78693 | -1.40023 | 34.64197 |
| C | -6.71213 | -1.12505 | 32.24712 |
| C | -6.63598 | 0.20575  | 31.49066 |
| H | -6.86685 | 0.10257  | 30.43225 |
| H | -5.62297 | 0.60862  | 31.55609 |
| H | -7.31813 | 0.94448  | 31.90884 |
| C | -5.79862 | -2.17728 | 31.60856 |
| H | -6.28705 | -0.92672 | 33.23589 |
| H | -5.88304 | -3.13955 | 32.11137 |
| H | -4.75830 | -1.85213 | 31.67750 |
| H | -6.01100 | -2.33486 | 30.55301 |
| C | 0.50653  | 9.08455  | 30.92608 |
| C | 0.12089  | 7.61195  | 31.08973 |

|   |          |          |          |
|---|----------|----------|----------|
| H | 0.99497  | 6.96668  | 31.01799 |
| H | -0.58969 | 7.31145  | 30.31736 |
| H | -0.35164 | 7.42700  | 32.05527 |
| C | -0.71869 | 10.00064 | 30.98692 |
| H | 0.94074  | 9.19406  | 29.93159 |
| H | -1.22874 | 9.92331  | 31.94799 |
| H | -1.44038 | 9.73100  | 30.21347 |
| H | -0.43784 | 11.04263 | 30.84226 |
| C | -5.69036 | 0.04337  | 20.04279 |
| S | -4.06057 | 0.60289  | 19.64718 |
| C | -4.42133 | 0.52986  | 17.91237 |
| C | -5.69551 | 0.08916  | 17.72672 |
| C | -6.42497 | -0.17793 | 18.91490 |
| H | -6.12426 | -0.01276 | 16.73810 |
| C | -3.43883 | 0.83658  | 16.90156 |
| S | -3.39877 | -0.19654 | 15.45672 |
| C | -2.10671 | 0.78119  | 14.75098 |
| C | -1.77635 | 1.79184  | 15.59537 |
| C | -2.51624 | 1.84133  | 16.80652 |
| H | -0.99390 | 2.50296  | 15.36038 |
| C | -7.84687 | -0.68148 | 18.92372 |
| C | -7.98735 | -2.11072 | 19.46275 |
| H | -8.24675 | -0.62712 | 17.90800 |
| H | -8.46813 | -0.01776 | 19.53108 |
| C | -7.18822 | -3.15145 | 18.68594 |
| H | -9.04651 | -2.38584 | 19.46847 |
| H | -7.66717 | -2.11933 | 20.50530 |
| C | -7.12876 | -4.50171 | 19.39252 |
| H | -6.17167 | -2.77769 | 18.53140 |
| H | -7.61459 | -3.27049 | 17.68358 |
| C | 5.53416  | 6.34503  | 18.60317 |
| H | 3.76988  | 7.06381  | 19.60452 |
| H | -6.64802 | -4.36482 | 20.36700 |
| C | 5.56379  | 4.99270  | 19.29864 |
| H | -5.35738 | -5.23014 | 18.41688 |
| H | 5.07625  | 6.23689  | 17.61471 |
| H | 6.02526  | 5.06042  | 20.28539 |
| H | 6.12712  | 4.25546  | 18.72505 |
| H | 4.55674  | 4.59560  | 19.43807 |
| C | -2.27278 | 2.89801  | 17.84553 |
| C | -1.00476 | 2.65147  | 18.67162 |
| H | -3.13349 | 2.96856  | 18.51225 |
| H | -2.18587 | 3.86968  | 17.34789 |

|   |          |          |          |
|---|----------|----------|----------|
| C | -0.71119 | 3.77188  | 19.66245 |
| H | -0.15456 | 2.52525  | 17.99388 |
| H | -1.10122 | 1.70008  | 19.20315 |
| C | 0.57078  | 3.55923  | 20.46058 |
| H | -1.55611 | 3.87926  | 20.35083 |
| H | -0.64763 | 4.72356  | 19.12299 |
| C | 0.86487  | 4.68431  | 21.44702 |
| H | 1.41481  | 3.45229  | 19.77006 |
| H | 0.51080  | 2.60856  | 21.00102 |
| C | 2.15271  | 4.48000  | 22.22987 |
| H | 0.02523  | 4.78289  | 22.14215 |
| H | 0.91246  | 5.63513  | 20.90611 |
| H | 2.12860  | 3.55138  | 22.80234 |
| H | 2.32719  | 5.29351  | 22.93479 |
| H | 3.01938  | 4.43034  | 21.56827 |
| C | -1.57348 | 0.47464  | 13.43237 |
| C | -1.18309 | 1.49917  | 12.57063 |
| C | -0.68150 | 1.23230  | 11.31670 |
| C | -0.54868 | -0.08364 | 10.87493 |
| C | -1.43776 | -0.83806 | 12.98041 |
| C | -0.92975 | -1.11713 | 11.73242 |
| H | -1.70420 | -1.65534 | 13.64088 |
| H | -1.31316 | 2.52865  | 12.88363 |
| H | -0.40868 | 2.04432  | 10.65653 |
| H | -0.81335 | -2.14324 | 11.40938 |
| O | -0.28909 | -4.87331 | 5.27329  |
| H | 4.47011  | -3.32457 | 4.57473  |
| H | 4.29528  | 2.73545  | 4.50808  |

---

**Table S8.** Oligothiophene-trisarylamine perylene monoimide, **1** (one binding point) with NiO (100) surface.

| Energy / au     | -206104.566183 |           |         |
|-----------------|----------------|-----------|---------|
| Coordinates / Å | x              | y         | z       |
| Ni              | 0.00452        | -4.39894  | 3.19293 |
| Ni              | -5.90951       | 1.49832   | 3.17887 |
| Ni              | 5.93225        | 1.48905   | 3.18078 |
| Ni              | -0.00441       | 7.41951   | 3.18853 |
| Ni              | 0.01354        | -1.43340  | 3.26374 |
| Ni              | -5.91049       | 4.45155   | 3.17869 |
| Ni              | 5.92738        | 4.45563   | 3.18576 |
| Ni              | 0.00319        | 10.36356  | 3.18307 |
| Ni              | -0.05872       | 1.40763   | 3.23968 |
| Ni              | 5.90823        | -4.41120  | 3.18081 |
| Ni              | -5.89541       | -4.40146  | 3.18300 |
| Ni              | 0.00569        | -10.31069 | 3.18748 |
| Ni              | -0.07097       | 4.50370   | 3.19550 |
| Ni              | 5.92093        | -1.46511  | 3.17342 |
| Ni              | -5.90446       | -1.45296  | 3.17981 |
| Ni              | 0.00499        | -7.35895  | 3.18379 |
| Ni              | -2.96538       | 1.49262   | 3.17986 |
| Ni              | 2.95775        | -4.41164  | 3.17933 |
| Ni              | 2.95983        | 7.42110   | 3.18875 |
| Ni              | 8.87087        | 1.49869   | 3.18179 |
| Ni              | 2.96420        | -1.47253  | 3.17166 |
| Ni              | -2.97238       | 4.45453   | 3.17984 |
| Ni              | -2.94380       | -7.35895  | 3.18149 |
| Ni              | -8.85643       | -1.45004  | 3.18446 |
| Ni              | 3.03024        | 1.41519   | 3.18535 |
| Ni              | -2.95875       | 7.41165   | 3.18346 |
| Ni              | -2.94600       | -4.40487  | 3.18246 |
| Ni              | -8.85736       | 1.50131   | 3.18411 |
| Ni              | -2.95229       | -1.45896  | 3.18064 |
| Ni              | 2.95540        | -7.36148  | 3.17705 |
| Ni              | 3.01204        | 4.50812   | 3.20747 |
| Ni              | 8.86613        | -1.45463  | 3.17697 |
| O               | -4.44221       | 0.02098   | 3.18166 |
| O               | 1.48299        | -5.89019  | 3.18974 |
| O               | 1.47843        | 5.92706   | 3.21306 |
| O               | 7.39705        | 0.01898   | 3.18536 |



|    |           |          |         |
|----|-----------|----------|---------|
| O  | 1.50269   | -2.95201 | 3.19212 |
| O  | -4.43826  | 2.97870  | 3.18750 |
| O  | 7.39325   | 2.97354  | 3.19135 |
| O  | 1.48004   | 8.88368  | 3.19642 |
| O  | 1.54578   | 0.02514  | 3.17167 |
| O  | -4.43068  | 5.93228  | 3.18195 |
| O  | -4.42518  | -5.88752 | 3.19097 |
| O  | -10.33432 | 0.02182  | 3.18795 |
| O  | 1.50557   | 2.98696  | 3.31538 |
| O  | 7.39186   | -2.93236 | 3.18422 |
| O  | -4.43379  | -2.93510 | 3.18696 |
| O  | 1.48249   | -8.83854 | 3.18432 |
| O  | -1.54060  | 0.01540  | 3.15468 |
| O  | 4.43534   | -5.88828 | 3.18100 |
| O  | 4.44080   | 5.93435  | 3.19551 |
| O  | 10.34289  | 0.02180  | 3.18422 |
| O  | -1.49586  | 2.99651  | 3.20112 |
| O  | 4.44626   | -2.93825 | 3.18267 |
| O  | -7.38151  | -2.93140 | 3.19157 |
| O  | -1.47346  | -8.83846 | 3.18667 |
| O  | 4.46388   | 0.00896  | 3.17987 |
| O  | -1.48424  | 5.94101  | 3.18748 |
| O  | -1.47242  | -5.88797 | 3.19238 |
| O  | -7.38473  | 0.02144  | 3.18716 |
| O  | -1.48983  | -2.94268 | 3.19330 |
| O  | -7.38304  | 2.97510  | 3.18791 |
| O  | 4.44158   | 2.97181  | 3.20001 |
| O  | -1.47261  | 8.88470  | 3.19188 |
| Ni | -4.43136  | 0.01539  | 1.08310 |
| Ni | 1.47991   | -5.88936 | 1.08624 |
| Ni | 1.47882   | 5.92930  | 1.09643 |
| Ni | 7.39342   | 0.01492  | 1.08100 |
| Ni | 1.48010   | -2.93924 | 1.09299 |
| Ni | -4.43339  | 2.96994  | 1.08303 |
| Ni | 7.39326   | 2.97025  | 1.08563 |
| Ni | 1.48004   | 8.88039  | 1.08877 |
| Ni | 1.48252   | 0.00536  | 1.09379 |
| Ni | -4.43094  | 5.92410  | 1.08272 |
| Ni | -4.42269  | -5.88841 | 1.08665 |
| Ni | -10.33310 | 0.01850  | 1.08571 |
| Ni | 1.47519   | 2.96145  | 1.08060 |
| Ni | 7.38863   | -2.93801 | 1.08065 |
| Ni | -4.42631  | -2.93669 | 1.08523 |

|    |          |           |         |
|----|----------|-----------|---------|
| Ni | 1.48039  | -8.84227  | 1.08383 |
| Ni | -1.48296 | 0.00864   | 1.09092 |
| Ni | 4.43247  | -5.89116  | 1.08178 |
| Ni | 4.43848  | 5.92831   | 1.09021 |
| Ni | 10.34332 | 0.01817   | 1.08429 |
| Ni | -1.48500 | 2.96623   | 1.09380 |
| Ni | 4.43640  | -2.94202  | 1.08010 |
| Ni | -7.37970 | -2.93419  | 1.08668 |
| Ni | -1.47079 | -8.84186  | 1.08479 |
| Ni | 4.44386  | 0.00694   | 1.08061 |
| Ni | -1.48124 | 5.92771   | 1.08710 |
| Ni | -1.47085 | -5.88750  | 1.08851 |
| Ni | -7.38193 | 0.01754   | 1.08394 |
| Ni | -1.47063 | -2.93457  | 1.09572 |
| Ni | -7.38253 | 2.97037   | 1.08243 |
| Ni | 4.44320  | 2.96775   | 1.09169 |
| Ni | -1.47321 | 8.87927   | 1.08494 |
| O  | 0.00406  | -4.41467  | 1.08996 |
| O  | -5.90868 | 1.49335   | 1.08215 |
| O  | 5.91615  | 1.49154   | 1.08569 |
| O  | 0.00363  | 7.39990   | 1.09266 |
| O  | 0.00620  | -1.46164  | 1.09536 |
| O  | -5.90607 | 4.44663   | 1.08174 |
| O  | 5.91146  | 4.44620   | 1.09056 |
| O  | 0.00418  | 10.35374  | 1.08627 |
| O  | 0.00412  | 1.49461   | 1.09994 |
| O  | 5.91264  | -4.41474  | 1.08120 |
| O  | -5.90528 | -4.41488  | 1.08735 |
| O  | 0.00430  | -10.32030 | 1.08554 |
| O  | 0.00951  | 4.44348   | 1.10617 |
| O  | 5.91711  | -1.46274  | 1.07975 |
| O  | -5.90802 | -1.46146  | 1.08343 |
| O  | 0.00368  | -7.36745  | 1.08597 |
| O  | -2.95975 | 1.49588   | 1.08332 |
| O  | 2.95952  | -4.41716  | 1.08241 |
| O  | 2.95598  | 7.39932   | 1.09359 |
| O  | 8.86674  | 1.49302   | 1.08356 |
| O  | 2.96703  | -1.46519  | 1.08264 |
| O  | -2.95372 | 4.44927   | 1.08571 |
| O  | -2.94891 | -7.36733  | 1.08586 |
| O  | -8.85877 | -1.46052  | 1.08666 |
| O  | 2.96184  | 1.49590   | 1.09681 |
| O  | -2.94913 | 7.40137   | 1.08427 |

|    |          |           |          |
|----|----------|-----------|----------|
| O  | -2.95148 | -4.41506  | 1.08632  |
| O  | -8.85859 | 1.49294   | 1.08408  |
| O  | -2.95844 | -1.46415  | 1.08226  |
| O  | 2.95613  | -7.36823  | 1.08250  |
| O  | 2.95192  | 4.44116   | 1.10691  |
| O  | 8.86710  | -1.46054  | 1.08264  |
| Ni | 0.00374  | -4.41611  | -1.03777 |
| Ni | -5.90521 | 1.48908   | -1.04303 |
| Ni | 5.91319  | 1.48876   | -1.04049 |
| Ni | 0.00353  | 7.39583   | -1.03683 |
| Ni | 0.00340  | -1.46605  | -1.03285 |
| Ni | -5.90506 | 4.44298   | -1.04437 |
| Ni | 5.91214  | 4.44331   | -1.03741 |
| Ni | 0.00436  | 10.35052  | -1.04152 |
| Ni | 0.00106  | 1.48726   | -1.03145 |
| Ni | 5.91040  | -4.41858  | -1.04429 |
| Ni | -5.90277 | -4.41702  | -1.03899 |
| Ni | 0.00441  | -10.32358 | -1.04228 |
| Ni | 0.00219  | 4.43992   | -1.03296 |
| Ni | 5.91235  | -1.46565  | -1.04488 |
| Ni | -5.90417 | -1.46419  | -1.04181 |
| Ni | 0.00385  | -7.36945  | -1.04114 |
| Ni | -2.95217 | 1.48816   | -1.03900 |
| Ni | 2.95640  | -4.41808  | -1.04276 |
| Ni | 2.95692  | 7.39629   | -1.03588 |
| Ni | 8.86632  | 1.48998   | -1.04285 |
| Ni | 2.95710  | -1.46646  | -1.04002 |
| Ni | -2.95213 | 4.44201   | -1.04037 |
| Ni | -2.94809 | -7.36945  | -1.04046 |
| Ni | -8.85716 | -1.46352  | -1.04101 |
| Ni | 2.95723  | 1.48812   | -1.03544 |
| Ni | -2.94998 | 7.39583   | -1.04098 |
| Ni | -2.94844 | -4.41613  | -1.03886 |
| Ni | -8.85755 | 1.48965   | -1.04291 |
| Ni | -2.95026 | -1.46521  | -1.03925 |
| Ni | 2.95606  | -7.37030  | -1.04319 |
| Ni | 2.95695  | 4.44081   | -1.03258 |
| Ni | 8.86573  | -1.46396  | -1.04376 |
| O  | -4.42942 | 0.01267   | -1.04390 |
| O  | 1.47971  | -5.89380  | -1.04318 |
| O  | 1.48056  | 5.91678   | -1.03087 |
| O  | 7.38923  | 0.01303   | -1.04456 |
| O  | 1.48093  | -2.94048  | -1.04084 |

|    |           |          |          |
|----|-----------|----------|----------|
| O  | -4.42830  | 2.96698  | -1.04380 |
| O  | 7.38766   | 2.96699  | -1.04106 |
| O  | 1.48013   | 8.87191  | -1.03859 |
| O  | 1.48151   | 0.01415  | -1.03625 |
| O  | -4.42589  | 5.91987  | -1.04297 |
| O  | -4.42747  | -5.89412 | -1.04035 |
| O  | -10.33401 | 0.01240  | -1.04211 |
| O  | 1.48142   | 2.96593  | -1.02427 |
| O  | 7.38935   | -2.94046 | -1.04526 |
| O  | -4.42884  | -2.94139 | -1.04254 |
| O  | 1.47954   | -8.84697 | -1.04342 |
| O  | -1.47391  | 0.01320  | -1.03909 |
| O  | 4.43364   | -5.89421 | -1.04449 |
| O  | 4.43164   | 5.91779  | -1.03460 |
| O  | 10.34183  | 0.01293  | -1.04286 |
| O  | -1.47207  | 2.96672  | -1.03506 |
| O  | 4.43564   | -2.94101 | -1.04569 |
| O  | -7.38194  | -2.94176 | -1.04038 |
| O  | -1.47282  | -8.84663 | -1.04291 |
| O  | 4.43552   | 0.01379  | -1.04117 |
| O  | -1.47079  | 5.91802  | -1.03669 |
| O  | -1.47330  | -5.89322 | -1.04130 |
| O  | -7.38197  | 0.01226  | -1.04350 |
| O  | -1.47350  | -2.94005 | -1.03993 |
| O  | -7.38146  | 2.96660  | -1.04501 |
| O  | 4.43292   | 2.96679  | -1.03408 |
| O  | -1.47137  | 8.87276  | -1.04103 |
| Ni | -4.42526  | 0.00720  | -3.13710 |
| Ni | 1.48028   | -5.89757 | -3.13733 |
| Ni | 1.48138   | 5.91296  | -3.12917 |
| Ni | 7.38870   | 0.00829  | -3.13832 |
| Ni | 1.47997   | -2.94469 | -3.13410 |
| Ni | -4.42553  | 2.96023  | -3.13634 |
| Ni | 7.38855   | 2.96224  | -3.13466 |
| Ni | 1.48165   | 8.86674  | -3.13275 |
| Ni | 1.47973   | 0.00725  | -3.13094 |
| Ni | -4.42595  | 5.91382  | -3.14229 |
| Ni | -4.42546  | -5.89799 | -3.13364 |
| Ni | -10.33298 | 0.00770  | -3.14239 |
| Ni | 1.48063   | 2.95964  | -3.12834 |
| Ni | 7.38859   | -2.94641 | -3.13990 |
| Ni | -4.42518  | -2.94553 | -3.13612 |
| Ni | 1.48061   | -8.85177 | -3.13920 |

|    |          |           |          |
|----|----------|-----------|----------|
| Ni | -1.47149 | 0.00719   | -3.13206 |
| Ni | 4.43325  | -5.89879  | -3.14481 |
| Ni | 4.43432  | 5.91400   | -3.13033 |
| Ni | 10.34183 | 0.00812   | -3.14345 |
| Ni | -1.47205 | 2.95923   | -3.13107 |
| Ni | 4.43358  | -2.94576  | -3.14011 |
| Ni | -7.37926 | -2.94663  | -3.13475 |
| Ni | -1.47193 | -8.85128  | -3.13854 |
| Ni | 4.43378  | 0.00808   | -3.13556 |
| Ni | -1.47175 | 5.91240   | -3.13486 |
| Ni | -1.47202 | -5.89712  | -3.13572 |
| Ni | -7.37973 | 0.00722   | -3.13996 |
| Ni | -1.47163 | -2.94452  | -3.13400 |
| Ni | -7.37955 | 2.96155   | -3.13709 |
| Ni | 4.43456  | 2.96120   | -3.13065 |
| Ni | -1.47090 | 8.86716   | -3.13396 |
| O  | 0.00213  | -4.42097  | -3.14594 |
| O  | -5.90474 | 1.48430   | -3.14897 |
| O  | 5.90851  | 1.48626   | -3.14474 |
| O  | 0.00426  | 7.38837   | -3.14161 |
| O  | 0.00298  | -1.46696  | -3.14378 |
| O  | -5.90328 | 4.43840   | -3.14828 |
| O  | 5.90747  | 4.43771   | -3.14382 |
| O  | 0.00359  | 10.34324  | -3.14642 |
| O  | 0.00489  | 1.48742   | -3.13907 |
| O  | 5.91186  | -4.42193  | -3.14346 |
| O  | -5.90644 | -4.42394  | -3.14457 |
| O  | 0.00331  | -10.32947 | -3.14242 |
| O  | 0.00560  | 4.43618   | -3.13801 |
| O  | 5.90998  | -1.46754  | -3.15022 |
| O  | -5.90562 | -1.46992  | -3.14870 |
| O  | 0.00177  | -7.37501  | -3.14906 |
| O  | -2.94946 | 1.48531   | -3.14499 |
| O  | 2.95635  | -4.42103  | -3.14647 |
| O  | 2.95501  | 7.38830   | -3.14065 |
| O  | 8.86330  | 1.48535   | -3.14554 |
| O  | 2.95602  | -1.46626  | -3.14634 |
| O  | -2.94804 | 4.43778   | -3.14425 |
| O  | -2.95190 | -7.37510  | -3.14794 |
| O  | -8.85840 | -1.47086  | -3.14632 |
| O  | 2.95499  | 1.48779   | -3.13932 |
| O  | -2.94725 | 7.39024   | -3.13992 |
| O  | -2.95186 | -4.42188  | -3.14633 |

|   |          |           |          |
|---|----------|-----------|----------|
| O | -8.85772 | 1.48397   | -3.14230 |
| O | -2.95098 | -1.46830  | -3.14648 |
| O | 2.95534  | -7.37570  | -3.15139 |
| O | 2.95465  | 4.43626   | -3.13711 |
| O | 8.86429  | -1.46961  | -3.15059 |
| H | 0.07161  | -9.95559  | 5.81496  |
| H | 7.87006  | -1.94570  | 23.19986 |
| C | -0.04665 | -7.53854  | 14.14668 |
| C | -0.07222 | -6.28862  | 13.50792 |
| C | 0.49200  | -7.65545  | 15.41313 |
| C | 1.06305  | -6.51986  | 16.04753 |
| C | 1.09304  | -5.26151  | 15.37498 |
| C | 0.44865  | -5.12594  | 14.09389 |
| H | -0.46145 | -8.40800  | 13.66392 |
| C | 1.61243  | -6.64308  | 17.34585 |
| C | 2.15362  | -5.54253  | 17.97511 |
| C | 2.25063  | -4.30959  | 17.30352 |
| C | 1.77421  | -4.14951  | 15.98631 |
| H | 2.54462  | -5.64784  | 18.97806 |
| C | 0.36359  | -3.78712  | 13.49086 |
| C | 1.19928  | -2.73817  | 14.00448 |
| C | 1.96351  | -2.90781  | 15.20502 |
| C | -0.48851 | -3.47483  | 12.42859 |
| C | -0.45558 | -2.23346  | 11.78042 |
| C | 0.48382  | -1.29584  | 12.13902 |
| C | 1.32134  | -1.50424  | 13.27296 |
| H | -1.18594 | -4.21614  | 12.06229 |
| H | -1.11142 | -2.04397  | 10.93862 |
| C | 2.25731  | -0.52569  | 13.68306 |
| C | 3.04549  | -0.74596  | 14.79105 |
| C | 2.88465  | -1.91942  | 15.55585 |
| H | 3.50665  | -2.04968  | 16.42353 |
| H | 2.34252  | 0.38782   | 13.11529 |
| H | 3.76657  | -0.00928  | 15.11838 |
| C | 0.48143  | -8.99267  | 16.05512 |
| N | 1.05813  | -9.01834  | 17.34915 |
| C | 1.63125  | -7.93283  | 18.05639 |
| O | 0.03654  | -10.00088 | 15.54299 |
| O | 2.12895  | -8.11586  | 19.14971 |
| O | 0.61667  | -0.08164  | 11.49402 |
| C | 0.54754  | -0.04071  | 10.11034 |
| C | 1.01608  | -1.09547  | 9.31811  |
| C | 0.87352  | -1.02262  | 7.94213  |

|   |          |           |          |
|---|----------|-----------|----------|
| C | 0.34579  | 0.11822   | 7.32524  |
| C | -0.05953 | 1.19029   | 8.12611  |
| C | 0.02060  | 1.11149   | 9.52288  |
| H | 1.45935  | -1.96763  | 9.78699  |
| H | 1.15548  | -1.86338  | 7.30896  |
| H | -0.45784 | 2.08277   | 7.65417  |
| H | -0.38712 | 1.88641   | 10.15618 |
| C | 0.18164  | 0.13343   | 5.82303  |
| O | 0.10826  | -1.00649  | 5.29763  |
| O | 0.11962  | 1.28558   | 5.25748  |
| O | -0.70838 | -6.22359  | 12.27743 |
| C | -0.37176 | -7.12857  | 11.27650 |
| C | 0.93352  | -7.58417  | 11.07880 |
| C | 1.20084  | -8.43145  | 10.00070 |
| C | 0.19693  | -8.87008  | 9.12146  |
| C | -1.10597 | -8.37875  | 9.35294  |
| C | -1.39621 | -7.53165  | 10.42419 |
| H | -1.91593 | -8.69430  | 8.71530  |
| H | -2.40676 | -7.18037  | 10.59596 |
| H | 2.22799  | -8.76066  | 9.85809  |
| H | 1.74296  | -7.21382  | 11.70230 |
| C | 0.45227  | -9.84773  | 7.95997  |
| C | -9.85906 | 1.65212   | 7.77953  |
| H | -9.72656 | 1.00349   | 6.90314  |
| H | -9.44958 | 1.13172   | 8.64467  |
| H | -9.26974 | 2.55872   | 7.60874  |
| C | -0.06631 | -9.24341  | 6.63407  |
| H | -1.13294 | -9.00704  | 6.67507  |
| H | 0.46485  | -8.33190  | 6.36791  |
| C | -0.28831 | -11.17501 | 8.24366  |
| H | 10.44124 | 0.79959   | 8.30179  |
| H | 0.03900  | -11.59605 | 9.19263  |
| H | 11.71742 | -0.08800  | 7.45107  |
| O | 2.71503  | -3.21302  | 17.98212 |
| C | 3.75217  | -3.34726  | 18.91165 |
| C | 3.50278  | -2.82514  | 20.20403 |
| C | 4.51920  | -2.88447  | 21.15692 |
| C | 5.79967  | -3.45258  | 20.85012 |
| C | 6.00854  | -3.98579  | 19.55047 |
| C | 4.99808  | -3.93137  | 18.58344 |
| H | 2.54940  | -2.34940  | 20.42401 |
| H | 5.15350  | -4.37463  | 17.60037 |
| H | 6.94426  | -4.46506  | 19.29248 |

|   |           |           |          |
|---|-----------|-----------|----------|
| H | 4.33744   | -2.43303  | 22.13239 |
| C | 6.90911   | -3.46524  | 21.93030 |
| C | -3.57866  | 7.71473   | 21.40808 |
| H | -3.69278  | 6.63721   | 21.18295 |
| H | -2.78264  | 7.78483   | 22.17007 |
| H | -3.19738  | 8.24093   | 20.49594 |
| C | 6.40607   | -4.29883  | 23.17384 |
| H | 6.21915   | -5.35171  | 22.91800 |
| H | 5.47445   | -3.87171  | 23.60794 |
| H | 7.18215   | -4.28063  | 23.95455 |
| C | 7.18220   | -1.98572  | 22.36176 |
| H | 7.61310   | -1.40463  | 21.52752 |
| H | 6.26765   | -1.47002  | 22.66163 |
| N | 1.14394   | -10.25488 | 17.96656 |
| C | -9.48996  | 0.82514   | 17.71140 |
| C | -9.34025  | -0.44528  | 18.48362 |
| C | -10.36558 | -0.86540  | 19.37301 |
| C | -11.51339 | -0.06662  | 19.59491 |
| C | 0.11703   | -10.57630 | 18.87974 |
| O | -8.64780  | 1.25016   | 16.95156 |
| O | -0.82902  | -9.84201  | 19.04984 |
| C | -8.24192  | -1.25457  | 18.25494 |
| C | -8.08089  | -2.46570  | 18.96401 |
| C | 2.76504   | 8.92422   | 19.86065 |
| C | 1.60156   | 9.71432   | 20.06999 |
| H | -7.47035  | -0.88119  | 17.59200 |
| H | -7.21491  | -3.08911  | 18.82181 |
| C | 0.57576   | 9.29292   | 20.95156 |
| C | -0.53697  | 10.09099  | 21.14886 |
| C | 11.12616  | -0.50272  | 20.46011 |
| H | -1.30650  | 9.74235   | 21.82901 |
| H | 10.26061  | 0.12906   | 20.60834 |
| C | 2.94171   | 7.64470   | 20.58332 |
| N | 1.88772   | 7.29171   | 21.41103 |
| C | 0.74580   | 8.02739   | 21.71621 |
| O | 3.91565   | 6.93198   | 20.50247 |
| O | -0.01847  | 7.63870   | 22.57303 |
| H | 2.07116   | 6.50094   | 22.04043 |
| H | 1.37051   | 2.77282   | 4.24352  |

---



**Table S9.** Perylene monoimide naphthalene diimide, **2** with NiO (100) surface.

| Energy / au     | -206105.208680 |          |         |
|-----------------|----------------|----------|---------|
| Coordinates / Å | x              | y        | z       |
| Ni              | 3.14167        | -3.11801 | 3.15938 |
| Ni              | -5.20864       | -3.13226 | 3.14654 |
| Ni              | 3.16796        | 5.23843  | 3.14949 |
| Ni              | -5.21811       | 5.23550  | 3.15310 |
| Ni              | 1.04518        | -1.02617 | 3.37067 |
| Ni              | -7.29792       | -1.04530 | 3.14682 |
| Ni              | 1.07576        | 7.33072  | 3.15336 |
| Ni              | -7.29711       | 7.31932  | 3.14714 |
| Ni              | -1.00230       | 0.92332  | 3.31756 |
| Ni              | 7.32561        | 1.04511  | 3.14739 |
| Ni              | -1.02650       | -7.29441 | 3.15059 |
| Ni              | 7.32551        | -7.30011 | 3.14704 |
| Ni              | -3.18645       | 3.12761  | 3.17709 |
| Ni              | 5.24764        | 3.13562  | 3.14369 |
| Ni              | -3.11803       | -5.21501 | 3.14820 |
| Ni              | 5.23662        | -5.21080 | 3.14789 |
| Ni              | -3.12636       | -1.05318 | 3.14807 |
| Ni              | 5.24093        | -1.04308 | 3.14993 |
| Ni              | -3.12829       | 7.32904  | 3.15453 |
| Ni              | 5.24398        | 7.32080  | 3.14687 |
| Ni              | 3.16075        | 1.03012  | 3.14439 |
| Ni              | -5.22027       | 1.03390  | 3.15122 |
| Ni              | 3.15537        | -7.29645 | 3.14943 |
| Ni              | -5.20939       | -7.29924 | 3.14815 |
| Ni              | 1.14262        | 3.13910  | 3.14904 |
| Ni              | -7.30131       | 3.13597  | 3.14672 |
| Ni              | 1.06452        | -5.21407 | 3.15436 |
| Ni              | -7.29575       | -5.21508 | 3.14572 |
| Ni              | -1.02252       | -3.13674 | 3.14997 |
| Ni              | 7.32408        | -3.12889 | 3.14649 |
| Ni              | -1.02627       | 5.29937  | 3.19178 |
| Ni              | 7.32706        | 5.22861  | 3.14627 |
| O               | -3.12790       | -3.14032 | 3.16389 |
| O               | 5.24121        | -3.13122 | 3.16636 |
| O               | -3.11493       | 5.22207  | 3.19682 |
| O               | 5.24392        | 5.22983  | 3.16681 |
| O               | 3.17648        | -1.04063 | 3.15631 |

|    |          |          |         |
|----|----------|----------|---------|
| O  | -5.21387 | -1.04545 | 3.16709 |
| O  | 3.15383  | 7.31685  | 3.17122 |
| O  | -5.20780 | 7.31501  | 3.17213 |
| O  | 1.10030  | 1.10261  | 3.10550 |
| O  | -7.29730 | 1.04856  | 3.16674 |
| O  | 1.06297  | -7.30676 | 3.17243 |
| O  | -7.29480 | -7.30529 | 3.16548 |
| O  | -1.03465 | 3.19877  | 3.58827 |
| O  | 7.32852  | 3.13942  | 3.16554 |
| O  | -1.03186 | -5.22585 | 3.16800 |
| O  | 7.32602  | -5.21779 | 3.16649 |
| O  | -1.06879 | -1.09699 | 3.10131 |
| O  | 7.32872  | -1.04148 | 3.16653 |
| O  | -1.02887 | 7.32559  | 3.17711 |
| O  | 7.32724  | 7.31579  | 3.16678 |
| O  | -3.14191 | 1.05629  | 3.16700 |
| O  | 5.24726  | 1.05230  | 3.16469 |
| O  | -3.11997 | -7.30653 | 3.17107 |
| O  | 5.24001  | -7.30446 | 3.16735 |
| O  | 3.17254  | 3.14840  | 3.16002 |
| O  | -5.21890 | 3.14131  | 3.16918 |
| O  | 3.15360  | -5.21897 | 3.16857 |
| O  | -5.20958 | -5.22061 | 3.16663 |
| O  | 1.06233  | -3.15335 | 3.16363 |
| O  | -7.29595 | -3.13146 | 3.16601 |
| O  | 1.06062  | 5.22714  | 3.19282 |
| O  | -7.29482 | 5.22750  | 3.16905 |
| Ni | -3.11735 | -3.13380 | 1.05722 |
| Ni | 5.22998  | -3.13084 | 1.05801 |
| Ni | -3.11868 | 5.21910  | 1.07589 |
| Ni | 5.23690  | 5.22129  | 1.05377 |
| Ni | 3.12939  | -1.04609 | 1.07500 |
| Ni | -5.21024 | -1.04764 | 1.05473 |
| Ni | 3.14906  | 7.31284  | 1.05642 |
| Ni | -5.20922 | 7.30977  | 1.05745 |
| Ni | 1.05419  | 1.02388  | 1.07383 |
| Ni | -7.29813 | 1.04109  | 1.05436 |
| Ni | 1.05871  | -7.30573 | 1.05877 |
| Ni | -7.29747 | -7.30881 | 1.05354 |
| Ni | -1.02568 | 3.11457  | 0.98442 |
| Ni | 7.32327  | 3.13082  | 1.05221 |
| Ni | -1.02913 | -5.22123 | 1.05686 |
| Ni | 7.32075  | -5.22025 | 1.05382 |

|    |          |          |         |
|----|----------|----------|---------|
| Ni | -1.01676 | -1.04463 | 1.06854 |
| Ni | 7.32076  | -1.04630 | 1.05397 |
| Ni | -1.03020 | 7.31007  | 1.06142 |
| Ni | 7.32289  | 7.31043  | 1.05323 |
| Ni | -3.10938 | 1.03429  | 1.08226 |
| Ni | 5.23585  | 1.03992  | 1.05363 |
| Ni | -3.11991 | -7.30866 | 1.05786 |
| Ni | 5.23453  | -7.30663 | 1.05478 |
| Ni | 3.15047  | 3.12865  | 1.05003 |
| Ni | -5.20807 | 3.12841  | 1.05631 |
| Ni | 3.14371  | -5.21601 | 1.05976 |
| Ni | -5.20868 | -5.22152 | 1.05421 |
| Ni | 1.05626  | -3.11600 | 1.08078 |
| Ni | -7.29817 | -3.13417 | 1.05341 |
| Ni | 1.06124  | 5.22602  | 1.06753 |
| Ni | -7.29687 | 5.22039  | 1.05536 |
| O  | 3.14813  | -3.13718 | 1.05974 |
| O  | -5.21162 | -3.13656 | 1.05401 |
| O  | 3.14332  | 5.21995  | 1.06153 |
| O  | -5.20353 | 5.21628  | 1.06577 |
| O  | 1.06023  | -1.04733 | 1.05171 |
| O  | -7.29791 | -1.04576 | 1.05486 |
| O  | 1.05323  | 7.30526  | 1.06690 |
| O  | -7.29535 | 7.30677  | 1.05678 |
| O  | -1.03694 | 1.07860  | 1.10853 |
| O  | 7.32461  | 1.04468  | 1.05438 |
| O  | -1.03244 | -7.31792 | 1.05988 |
| O  | 7.32219  | -7.31159 | 1.05514 |
| O  | -3.08389 | 3.13522  | 1.10877 |
| O  | 5.23658  | 3.13519  | 1.05188 |
| O  | -3.12253 | -5.22787 | 1.05570 |
| O  | 5.23420  | -5.22357 | 1.05529 |
| O  | -3.12978 | -1.04768 | 1.05176 |
| O  | 5.23669  | -1.04455 | 1.05381 |
| O  | -3.11603 | 7.30165  | 1.06810 |
| O  | 5.23383  | 7.30818  | 1.05635 |
| O  | 3.15703  | 1.05350  | 1.04680 |
| O  | -5.20906 | 1.04755  | 1.05960 |
| O  | 3.14512  | -7.31248 | 1.05830 |
| O  | -5.20849 | -7.31439 | 1.05731 |
| O  | 1.02445  | 3.14748  | 1.08337 |
| O  | -7.29367 | 3.13291  | 1.05647 |
| O  | 1.05627  | -5.22611 | 1.05861 |

|    |          |          |          |
|----|----------|----------|----------|
| O  | -7.29781 | -5.22408 | 1.05454  |
| O  | -1.03640 | -3.14676 | 1.04788  |
| O  | 7.32205  | -3.13477 | 1.05416  |
| O  | -1.03123 | 5.18011  | 1.11511  |
| O  | 7.32395  | 5.22061  | 1.05497  |
| Ni | 3.14141  | -3.13426 | -1.06322 |
| Ni | -5.20938 | -3.13711 | -1.07139 |
| Ni | 3.14540  | 5.21923  | -1.06868 |
| Ni | -5.20853 | 5.21775  | -1.06482 |
| Ni | 1.05758  | -1.05073 | -1.05909 |
| Ni | -7.29905 | -1.04914 | -1.07241 |
| Ni | 1.05830  | 7.30796  | -1.06587 |
| Ni | -7.29796 | 7.30626  | -1.07149 |
| Ni | -1.03205 | 1.02948  | -1.06224 |
| Ni | 7.32085  | 1.03904  | -1.07280 |
| Ni | -1.03213 | -7.31288 | -1.06688 |
| Ni | 7.32062  | -7.31182 | -1.07262 |
| Ni | -3.12532 | 3.12524  | -1.06660 |
| Ni | 5.23334  | 3.12751  | -1.07307 |
| Ni | -3.12040 | -5.22437 | -1.06958 |
| Ni | 5.23126  | -5.22277 | -1.07062 |
| Ni | -3.12024 | -1.04965 | -1.06352 |
| Ni | 5.22898  | -1.04856 | -1.06769 |
| Ni | -3.12190 | 7.30483  | -1.06321 |
| Ni | 5.23336  | 7.30730  | -1.07184 |
| Ni | 3.14329  | 1.03540  | -1.06612 |
| Ni | -5.20707 | 1.03639  | -1.06511 |
| Ni | 3.14439  | -7.30977 | -1.06909 |
| Ni | -5.20965 | -7.31251 | -1.07064 |
| Ni | 1.06330  | 3.12632  | -1.07111 |
| Ni | -7.29708 | 3.12726  | -1.07009 |
| Ni | 1.05566  | -5.21993 | -1.06400 |
| Ni | -7.29860 | -5.22437 | -1.07255 |
| Ni | -1.03051 | -3.13567 | -1.06466 |
| Ni | 7.31890  | -3.13602 | -1.07210 |
| Ni | -1.03116 | 5.22037  | -1.06616 |
| Ni | 7.32148  | 5.21722  | -1.07256 |
| O  | -3.12166 | -3.13737 | -1.07441 |
| O  | 5.23291  | -3.13606 | -1.07455 |
| O  | -3.11323 | 5.21096  | -1.05367 |
| O  | 5.23254  | 5.21862  | -1.07374 |
| O  | 3.14627  | -1.04634 | -1.07433 |
| O  | -5.21018 | -1.04712 | -1.07428 |

|    |          |          |          |
|----|----------|----------|----------|
| O  | 3.14347  | 7.30567  | -1.06971 |
| O  | -5.20671 | 7.30363  | -1.06816 |
| O  | 1.05022  | 1.04938  | -1.06821 |
| O  | -7.29483 | 1.04243  | -1.07370 |
| O  | 1.05523  | -7.31529 | -1.06901 |
| O  | -7.29663 | -7.31406 | -1.07488 |
| O  | -1.03395 | 3.13093  | -1.06807 |
| O  | 7.32362  | 3.13095  | -1.07557 |
| O  | -1.03330 | -5.22899 | -1.07348 |
| O  | 7.32152  | -5.22466 | -1.07579 |
| O  | -1.03366 | -1.04216 | -1.06887 |
| O  | 7.32202  | -1.04676 | -1.07638 |
| O  | -1.03202 | 7.29652  | -1.05639 |
| O  | 7.32227  | 7.30556  | -1.07478 |
| O  | -3.11574 | 1.04825  | -1.06080 |
| O  | 5.23512  | 1.04393  | -1.07802 |
| O  | -3.11992 | -7.31732 | -1.06940 |
| O  | 5.23280  | -7.31333 | -1.07417 |
| O  | 3.14065  | 3.13304  | -1.06837 |
| O  | -5.20137 | 3.13057  | -1.06160 |
| O  | 3.14454  | -5.22511 | -1.07219 |
| O  | -5.20914 | -5.22631 | -1.07498 |
| O  | 1.05606  | -3.13741 | -1.07240 |
| O  | -7.29768 | -3.13625 | -1.07610 |
| O  | 1.05004  | 5.21534  | -1.05995 |
| O  | -7.29412 | 5.21738  | -1.07141 |
| Ni | -3.12351 | -3.14203 | -3.16055 |
| Ni | 5.22632  | -3.14114 | -3.16195 |
| Ni | -3.12494 | 5.21078  | -3.15213 |
| Ni | 5.22869  | 5.21166  | -3.16309 |
| Ni | 3.13855  | -1.05491 | -3.15963 |
| Ni | -5.21242 | -1.05497 | -3.16142 |
| Ni | 3.14034  | 7.30152  | -3.16033 |
| Ni | -5.21269 | 7.29966  | -3.15886 |
| Ni | 1.05192  | 1.03051  | -3.15640 |
| Ni | -7.30087 | 1.03301  | -3.16306 |
| Ni | 1.05202  | -7.31652 | -3.15830 |
| Ni | -7.30147 | -7.31839 | -3.16485 |
| Ni | -1.03578 | 3.11985  | -3.15963 |
| Ni | 7.31739  | 3.12208  | -3.16392 |
| Ni | -1.03562 | -5.22957 | -3.15951 |
| Ni | 7.31607  | -5.22944 | -3.16432 |
| Ni | -1.03508 | -1.05595 | -3.15645 |

|    |          |          |          |
|----|----------|----------|----------|
| Ni | 7.31545  | -1.05433 | -3.16390 |
| Ni | -1.03604 | 7.30045  | -3.15430 |
| Ni | 7.31711  | 7.30038  | -3.16386 |
| Ni | -3.12418 | 1.03111  | -3.15411 |
| Ni | 5.22744  | 1.03274  | -3.16384 |
| Ni | -3.12434 | -7.31889 | -3.15888 |
| Ni | 5.22785  | -7.31723 | -3.16359 |
| Ni | 3.14093  | 3.12123  | -3.16075 |
| Ni | -5.21324 | 3.12117  | -3.15680 |
| Ni | 3.13884  | -5.22817 | -3.16013 |
| Ni | -5.21259 | -5.23020 | -3.16361 |
| Ni | 1.05181  | -3.14103 | -3.15794 |
| Ni | -7.30204 | -3.14210 | -3.16456 |
| Ni | 1.05290  | 5.21198  | -3.15597 |
| Ni | -7.30098 | 5.21105  | -3.16099 |
| O  | 3.13987  | -3.14166 | -3.18352 |
| O  | -5.21228 | -3.14184 | -3.18669 |
| O  | 3.13804  | 5.21230  | -3.18028 |
| O  | -5.20891 | 5.21054  | -3.17651 |
| O  | 1.05094  | -1.05138 | -3.18319 |
| O  | -7.30032 | -1.05213 | -3.18764 |
| O  | 1.05019  | 7.29822  | -3.17713 |
| O  | -7.29923 | 7.29916  | -3.18519 |
| O  | -1.03730 | 1.03868  | -3.17690 |
| O  | 7.31895  | 1.03695  | -3.18582 |
| O  | -1.03644 | -7.32328 | -3.17904 |
| O  | 7.31766  | -7.31929 | -3.18507 |
| O  | -3.12239 | 3.12471  | -3.17370 |
| O  | 5.22804  | 3.12537  | -3.18597 |
| O  | -3.12395 | -5.23237 | -3.18467 |
| O  | 5.22836  | -5.23051 | -3.18609 |
| O  | -3.12377 | -1.05119 | -3.18053 |
| O  | 5.22872  | -1.05211 | -3.18704 |
| O  | -3.12230 | 7.29617  | -3.17483 |
| O  | 5.22818  | 7.30006  | -3.18570 |
| O  | 3.13866  | 1.03821  | -3.18289 |
| O  | -5.20981 | 1.03752  | -3.17945 |
| O  | 3.13937  | -7.31952 | -3.18350 |
| O  | -5.21133 | -7.32101 | -3.18394 |
| O  | 1.04993  | 3.12597  | -3.17872 |
| O  | -7.29754 | 3.12442  | -3.18239 |
| O  | 1.05115  | -5.23149 | -3.18262 |
| O  | -7.30072 | -5.23104 | -3.18704 |

|   |          |          |          |
|---|----------|----------|----------|
| O | -1.03672 | -3.14148 | -3.18236 |
| O | 7.31746  | -3.14155 | -3.18744 |
| O | -1.03651 | 5.21016  | -3.17244 |
| O | 7.31871  | 5.21200  | -3.18606 |
| C | 0.07967  | 0.16651  | 5.91524  |
| O | 0.81578  | -0.70350 | 5.38512  |
| O | -0.75894 | 0.94054  | 5.34444  |
| H | -0.99030 | 2.96328  | 4.53266  |
| C | 6.55057  | -2.89594 | 15.08815 |
| C | 5.53910  | -2.40244 | 14.27414 |
| C | 6.68928  | -2.45317 | 16.37723 |
| C | 5.82907  | -1.45573 | 16.87516 |
| C | 4.82668  | -0.91136 | 16.02930 |
| C | 4.62019  | -1.45054 | 14.72181 |
| H | 7.22761  | -3.64914 | 14.71101 |
| C | 5.94822  | -0.99955 | 18.20338 |
| C | 5.07229  | -0.06254 | 18.68700 |
| C | 4.12625  | 0.50879  | 17.84632 |
| C | 4.03953  | 0.18558  | 16.49394 |
| H | 5.12733  | 0.24002  | 19.72356 |
| C | 3.48680  | -0.96949 | 13.93617 |
| C | 2.87169  | 0.25850  | 14.31398 |
| C | 3.19249  | 0.90011  | 15.54087 |
| C | 2.98480  | -1.63580 | 12.83142 |
| C | 1.97995  | -1.09188 | 12.03408 |
| C | 1.50041  | 0.15815  | 12.30380 |
| C | 1.92257  | 0.87161  | 13.44962 |
| H | 3.37379  | -2.60414 | 12.57083 |
| H | 1.60468  | -1.64118 | 11.18164 |
| C | 1.42832  | 2.15354  | 13.74707 |
| C | 1.85166  | 2.80380  | 14.87004 |
| C | 2.71476  | 2.17955  | 15.76789 |
| H | 3.01186  | 2.71161  | 16.65656 |
| H | 0.72161  | 2.61066  | 13.06866 |
| H | 1.49946  | 3.80546  | 15.08545 |
| C | 7.74739  | -3.02947 | 17.20776 |
| N | 7.80940  | -2.51575 | 18.52098 |
| C | 6.97583  | -1.53304 | 19.09870 |
| O | -8.16867 | -3.87939 | 16.83645 |
| O | 7.14009  | -1.18515 | 20.25497 |
| O | 0.51790  | 0.76248  | 11.53196 |
| C | 0.45138  | 0.56023  | 10.15708 |
| C | 1.58986  | 0.43358  | 9.37214  |

|   |          |          |          |
|---|----------|----------|----------|
| C | 1.44837  | 0.28675  | 8.00828  |
| C | 0.18621  | 0.30980  | 7.42098  |
| C | -0.94185 | 0.47476  | 8.21971  |
| C | -0.81333 | 0.58122  | 9.58883  |
| H | 2.56859  | 0.44161  | 9.83551  |
| H | 2.32074  | 0.17254  | 7.37444  |
| H | -1.92496 | 0.49848  | 7.76245  |
| H | -1.67861 | 0.68907  | 10.23295 |
| O | 5.42512  | -2.92060 | 12.98927 |
| C | 6.59315  | -3.22491 | 12.27810 |
| C | 7.64011  | -2.32750 | 12.19760 |
| C | -7.95759 | -2.65041 | 11.43702 |
| C | -7.87349 | -3.85204 | 10.74250 |
| C | 7.75401  | -4.72873 | 10.84425 |
| C | 6.64367  | -4.43129 | 11.60814 |
| H | 7.77986  | -5.67884 | 10.32389 |
| H | 5.81329  | -5.12096 | 11.69190 |
| H | -7.14752 | -1.93575 | 11.39048 |
| H | 7.58452  | -1.38451 | 12.72688 |
| C | -6.65772 | -4.23913 | 9.89320  |
| C | -5.57996 | -3.15048 | 9.89298  |
| H | -4.73575 | -3.46302 | 9.27711  |
| H | -5.19692 | -2.95395 | 10.89494 |
| H | -5.95127 | -2.20971 | 9.48402  |
| C | -7.10632 | -4.47113 | 8.44090  |
| H | -7.84123 | -5.27211 | 8.36432  |
| H | -6.25627 | -4.74352 | 7.81272  |
| H | -7.55836 | -3.57073 | 8.02265  |
| C | -6.03881 | -5.53010 | 10.45450 |
| H | -6.74188 | -6.36240 | 10.42987 |
| H | -5.72630 | -5.39556 | 11.49052 |
| H | -5.16181 | -5.82266 | 9.87422  |
| O | 3.19396  | 1.36925  | 18.40816 |
| C | 3.63231  | 2.47925  | 19.13849 |
| C | 2.78434  | 2.96277  | 20.11928 |
| C | 3.14972  | 4.08829  | 20.82947 |
| C | 4.35328  | 4.75559  | 20.59118 |
| C | 5.17515  | 4.24669  | 19.59336 |
| C | 4.82512  | 3.12006  | 18.86231 |
| H | 1.85319  | 2.44579  | 20.31451 |
| H | 5.48041  | 2.73572  | 18.08999 |
| H | 6.11666  | 4.72730  | 19.36406 |
| H | 2.47704  | 4.45056  | 21.59854 |



|   |          |          |          |
|---|----------|----------|----------|
| C | 4.71697  | 5.99234  | 21.42530 |
| C | 6.07070  | 6.58669  | 21.02321 |
| H | 6.88468  | 5.87156  | 21.15986 |
| H | 6.29480  | 7.45900  | 21.64382 |
| H | 6.07960  | 6.91795  | 19.98098 |
| C | 4.78786  | 5.59516  | 22.91287 |
| H | 5.53669  | 4.81759  | 23.07691 |
| H | 3.83434  | 5.21156  | 23.27608 |
| H | 5.05432  | 6.45712  | 23.53147 |
| C | 3.63995  | 7.07441  | 21.23167 |
| H | 3.56255  | 7.36975  | 20.18235 |
| H | 3.87828  | 7.96780  | 21.81588 |
| H | 2.65644  | 6.72743  | 21.54848 |
| N | -7.88866 | -3.03266 | 19.34483 |
| C | -6.65386 | -2.35418 | 19.31827 |
| C | -5.61261 | -2.91241 | 20.20494 |
| C | -5.88998 | -4.04201 | 21.00404 |
| C | -7.15102 | -4.67583 | 20.98497 |
| C | -8.22815 | -4.16511 | 20.11262 |
| O | -6.48528 | -1.38315 | 18.60807 |
| O | 7.37408  | -4.66414 | 20.04119 |
| C | -4.37521 | -2.31453 | 20.24358 |
| C | -3.37352 | -2.81829 | 21.07541 |
| C | -3.61442 | -3.91650 | 21.86552 |
| C | -4.87638 | -4.55232 | 21.84809 |
| H | -4.19610 | -1.44908 | 19.61922 |
| H | -2.39616 | -2.35383 | 21.11223 |
| C | -5.15675 | -5.68176 | 22.64928 |
| C | -6.39514 | -6.27659 | 22.61076 |
| C | -7.39460 | -5.77280 | 21.77627 |
| H | -6.57839 | -7.13947 | 23.23800 |
| H | 8.33471  | -6.23471 | 21.73841 |
| C | -2.54450 | -4.43685 | 22.74233 |
| N | -2.88837 | -5.55235 | 23.50560 |
| C | -4.10860 | -6.22804 | 23.53641 |
| O | -1.42702 | -3.95207 | 22.81984 |
| O | -4.26197 | -7.19977 | 24.25883 |
| H | -2.16449 | -5.91535 | 24.11114 |

---
